**Gene expression changes of seven stonefly species in responses to a latitudinal-environmental gradient.**

Maribet Gamboa<sup>1,2</sup>, Yusuke Gotoh<sup>2</sup>, Arnelyn D. Doloiras-Laraño<sup>1,2</sup>, Kozo Watanabe<sup>1,2</sup>

<sup>1</sup>Center Marine Environmental Studies (CMES), Ehime University, 790-8577, Matsuyama, Japan

<sup>2</sup>Department of Civil and Environmental Engineering, Ehime University, 790-8577, Matsuyama, Japan

Running head: Latitudinal-physiological changes of stoneflies

## Abstract

Latitudinal variation has been known to create strong selection pressure for genomic variation that enables the adaptation and survival of organisms. By altering gene expression patterns, organisms can modify their adaptive potential to heterogeneous environmental conditions along a latitudinal gradient; however, there is a gap in our understanding of how physiological consequences in wild species are affected and how changing environmental conditions act on multiple species. Here, we investigated how seven stream stonefly species sampled from four geographical regions in Japan differ in their responses to latitudinal variations by measuring gene expression (RNA-sequencing) differences within species and gene co-expression among species. We found that a large number of genes (622) were differentially expressed along the latitudinal gradient. The high species-specific gene expression diversity found at higher latitude regions was probably associated with low temperatures and high water discharge, which suggests the adaptive potential of stonefly specie. In contrast, similar gene expression patterns among species was observed at lower latitudes, which suggests that strong environmental stress occurs in warmer regions. Weighted gene co-expression network analysis (WGCNA) identified 22 genes with similar expression patterns among species along the latitudinal gradient. Among the four geographical regions, high differential expression patterns in the co-expressed genes from two regions were found, suggesting that the local environment strongly affects gene expression patterns among species in these regions. Respiration, metabolism, and developmental co-expressed genes exhibited a latitudinal cline, showing clear evidence of divergent adaptive responses to latitude. Our findings demonstrate that stonefly species are differentially adapted to local environmental conditions, and imply that adaptation in gene expression could be shared by multiple species under environmental stress conditions. This study highlights the importance of considering multiple species when evaluating the consequences of environmental changes on aquatic insect communities, and possible mechanisms to cope with environmental changes.

**Keywords:** environmental change, local adaptation, physiological ecology, RNA-seq, latitude, stoneflies

## 1           1. Introduction

2     In the face of climate change, a major research objective of conservation biology has become the  
3     determination of which species can adapt beyond the current physiological limitations (Hoffmann & Sgro,  
4     2011; Bellard et al., 2012). Physiological change can improve an organism's ability to cope with  
5     environmental changes and can be the basis for achieving evolutionary adaptation and persistence  
6     (Bijlsma & Loeschcke, 2005). Regardless of whether physiological plasticity or local adaptation is  
7     responsible for these changes, an understanding of the underlying molecular mechanisms involved in  
8     these changes are key to better predict how species will respond to climate change (Hoffmann & Sgro,  
9     2011).

10    Genetic methods developed over the last decades have generated multiple approaches to monitor gene  
11    expression variations regarding the link between physiological and environmental changes (Evans &  
12    Hofmann, 2012). Variations in gene expression play an important role in the adaptive processes of  
13    populations (Oleksiak et al., 2002; Whitehead & Crawford, 2006), are highly heritable (Whitehead &  
14    Crawford, 2006), and can lead to speciation that reflects species-specific physiological requirements  
15    (Uebbing et al., 2016). Differentially expressed gene (DEG) analysis has been used to study gene  
16    expression extensively. DEG analysis uses statistical methods to evaluate normalized read count data,  
17    which reveals quantitative changes that have occurred in gene expression (Costa-Silva et al., 2017).  
18    Among several environmental factors examined in DEG studies (e.g., Teets et al., 2012; Kvist et al., 2013),  
19    the most remarkable gene expression changes associated with environmental change have been  
20    attributed to latitudinal gradients (Zhao et al., 2015; Juneja et al., 2016; Porcelli et al., 2016; Salazar et al.,  
21    2019).

22    Latitudinal gradients have been observed to influence adaptive gene expression divergence among  
23    populations (Holloway et al., 2007; Pavey et al. 2010; Manel et al., 2010) as latitudinal gradients is linked  
24    with environmental variations such as temperature, UV radiation, and humidity (e.g., Fraser, 2013). Some  
25    examples of differential expression patterns in latitude-related genes include the upregulation of the  
26    circadian clock and metabolic genes in rice (*Oryza sativa*) caused by temperature and solar radiation  
27    variations at higher latitudes (Nagano et al., 2012), the regulation of oxidative stress genes related to  
28    salinization changes in fish (*Platichthys flesus*) at increasing latitudes (Larsen et al., 2007), and the latitude-  
29    linked upregulation of immunity and reproductive-related genes in flies (*Drosophila melanogaster*, Juneja  
30    et al., 2016). Hence, latitudinal gradients are an ideal system to study the effects of environmental  
31    variation on DEG patterns of organisms. However, previous studies have focused on target species in  
32    laboratory-controlled experiments, but wild multiple species still need to be studied.

33    Comparative studies on gene expression across multiple species have revealed important insights into  
34    molecular pathways and gene synchronization between species (Arnone & Davidson, 1997). One of the  
35    challenges of multi-species analysis is identifying co-expressed genes, which are genes that show similar  
36    expression profiles among different species under the same trait or condition. Co-expression analysis can  
37    be used to discover sets of co-expressed genes found in multiple species, and to discover genes associated  
38    with a specific trait (Schadt et al., 2005). Weighted gene co-expression network analysis (WGCNA) is one  
39    widely utilized method (Stuart et al., 2003), and is built from gene expression data by calculating co-  
40    expression values in terms of gene pairwise similarity scores at a significant threshold. WGCNA can detect  
41    the genes associated with a particular trait or condition (Zhang & Horvath, 2005), and has been used to  
42    detect co-expressed genes in several taxa (e.g., eukaryotes, Martin & Fraser, 2018; mouse, Fuller et al.,

43 2007; cattle, Keogh et al., 2019; plants, Wisecaver et al., 2017). These studies have revealed new insights  
44 into co-expression; however, WGCNA has been scarcely used to investigate whether co-expressed genes  
45 are associated with environmental factors, except for a few studies, such as those on fish (Bernal et al.,  
46 2020) and coral (Kenkel & Matz, 2016).

47 In contrast to the studies focused on DEG along the latitude-environmental gradient, the spatial  
48 distribution of gene expression diversity (i.e., the number of genes expressed within a species, Zhang et  
49 al., 2015) along the gradient has received less attention. Notably, changes in gene expression diversity can  
50 result from alterations in gene expression levels, the replacement of expressed genes by other genes, or  
51 the downregulation or upregulation of specific gene expressions across different habitats. Changes in  
52 gene expression diversity along a latitudinal gradient have been reported in microbial communities to be  
53 lower in polar than in non-polar waters because of possible ocean warming (Salazar et al., 2019), but they  
54 have not yet been studied for any other taxa.

55 In this study, we evaluated the spatial change of gene expressions in seven stonefly species along a  
56 latitudinal gradient in Japan. Stoneflies are aquatic insects considered to be more sensitive to  
57 environmental changes, such as low oxygen concentrations and high water temperatures than other  
58 aquatic insects (Prenda & Gallardo-Mayenco, 1999). Stoneflies are distributed worldwide, with higher  
59 species diversity at higher latitudes, and the species has a high diversity and ecological relevance in  
60 freshwater ecosystems around the world (DeWalt & Ower, 2019). The seven species selected (*Perlodini*  
61 *incertae*, *Haploperla japonica*, *Nemoura ovocercia*, *Taenionema japonicum*, *Stavsolus japonicus*,  
62 *Amphinemura longispina*, and *Eocapnia nivalis*) have been studied previously for their responses to a  
63 latitudinal gradient in Japan using genomic and proteomics approaches, which showed genome-wide  
64 signatures of adaptive divergence among populations along the latitude gradient (Gamboa & Watanabe,  
65 2019) using double-digest restriction site-associated DNA sequencing, and a high oxygen-protein  
66 expression at higher latitudes using quantitative proteomics and protein differential expression analysis  
67 (Gamboa et al., 2017), but, specific gene functions and relative gene expression levels related to the  
68 gradient remain to be determined.

69 A recent global study on aquatic insects has suggested an increase in organism abundance over the years  
70 (Klink et al., 2020), but, human-mediated environmental changes and global warming threaten the  
71 survival of aquatic insect species (Gamboa, 2010; Sheldon, 2012). Understanding the adaptive potential  
72 of species (i.e., ability of species to respond to selection by means of molecular changes, Eizaguirre &  
73 Baltazar-Soares, 2014) might be assessed by variations of gene expression patterns along the  
74 environmental gradient, could be a robust and practical way to understand the mechanisms behind their  
75 fitness, prevalence, and survival. Studies on gene expression changes as a result of environmental stress  
76 in aquatic insects have been rarely conducted on selected genes related to thermal effects in the mayfly  
77 *Neocloeon triangulifer* (Chou et al., 2018), gene expression profiling to stream drying in the caddisfly  
78 *Micropterna lateralis* (Erzinger et al., 2019), and thermal adaptation in the cold stonefly *Lednia tumana*,  
79 *L. tetonica* and *Zapada* sp. (Hotaling, Shah et al., 2020) under controlled experiments, where other species  
80 have not yet been investigated.

81 Here, we focused on the adaptive mechanisms of wild stonefly species by detecting changes in the gene  
82 expression profiles of the hemolymph. The insect hemolymph plays a key role in insect immunity, embryo  
83 development, cytokines, antioxidant proteins, and oxygen protein transportation (Kanost et al., 1990;  
84 Burmester, 1999). For the seven species, patterns of gene expression were analyzed from samples

85 collected over a latitudinal gradient across the Japan Archipelago. Specifically, we aimed to (1) determine  
86 whether the transcriptional responses within species were influenced by latitude, (2) assess the spatial  
87 distribution of gene expression diversity along the latitude gradient, and (3) identify common molecular  
88 mechanisms associated with the latitudinal adaptation response in different species. Our results highlight  
89 the utility of RNA-sequencing (RNA-seq) analyses to identify candidate genes that underline the among-  
90 family variations in survival required for the adaptive response of natural selection.

91

## 92 **2. Methods**

93

### 94 2.1. Sampling collection and processing

95 We collected seven stonefly species that occur commonly through four regions of Japan, to test the  
96 potential effects of the latitudinal gradient on gene expression patterns. Seven species of stream  
97 stoneflies (*P. incertae*, *H. japonica*, *N. ovocercia*, *T. japonicum*, *S. japonicus*, *A. longispina*, and *E. nivalis*)  
98 were selected to gather a broad multispecies perspective. These species were selected as they represent  
99 six taxonomical families that each have their own different biological requirements, such as feeding  
100 behavior and habitat preferences. Stonefly nymphs were sampled at 12 sampling sites across four  
101 geographical regions (Matsuyama, Gifu, Sendai, and Sapporo) with different climatic conditions. Samples  
102 were collected over a 2-week winter period, starting at the end of January 2015 (Table S1) using D-flame  
103 nets (mesh size = 250  $\mu$ m). Specimens collected at the latest developmental stage were identified using  
104 the taxonomic key of Japanese aquatic insects (Kawai & Tanida, 2005). RNA and proteins were extracted  
105 simultaneously *in situ* by withdrawing the hemolymph from live individual specimens with a sterile  
106 syringe. The hemolymph was placed into TRIzol reagent (Ambion), and RNA was isolated according to the  
107 manufacturer's instructions.

108

### 109 2.2. RNA-seq library preparation

110 The RNA extracted from TRIzol was cleaned using the RNeasy MinElute kit (Qiagen). The quality and  
111 concentration of the RNA was checked using the 2100 Bioanalyzer (Agilent Technologies, Inc.) and Qubit  
112 flex Fluorometer (ThermoFisher), respectively. Sample pools were used for expression analyses to ensure  
113 sufficient high-quality RNA and to reduce variance in expression due to individual differences. Two  
114 biological replicates were included for each species at each geographical region. Each biological replicate  
115 was produced from the pools of an average of 18 sampled individuals, as suggested by Rajkumar et al.  
116 (2015). RNA-seq libraries were performed using the protocol proposed by Wang (2011), with a few  
117 modifications. Briefly, the total RNA was fragmented at 70 °C for 5-min (RNA fragmentation reagents;  
118 ThermoFisher), and then precipitated with 3 M sodium acetate, glycogen, and 100% ethanol at -20 °C for  
119 60 min. The cDNA was synthesized using the SuperScript III kit (ThermoFisher) according to the  
120 manufacturer's instructions and then purified with Ampure DNA beads (Beckman Coulter). The purified  
121 dsDNA product was end-repaired (New England Biolabs) and A-tailed (Klenow fragment, New England  
122 Biolabs) according to the manufacturer's instructions. The resulting product was added to a mixture of 1  
123  $\mu$ l indexed adaptor, 6.75  $\mu$ l ligase buffer, 0.25  $\mu$ l T4 DNA ligase (New England Biolabs), and 2  $\mu$ l of water  
124 at 27 °C for 15-min. The mixture was purified with Ampure DNA beads, mixed with uracil DNA glycosylase  
125 (Enzymatics), and incubated at 37 °C for 30-min. The library was amplified using a mixture of dsDNA-uracil  
126 product, 1  $\mu$ l illumina paired-end primers (10  $\mu$ M each), 5  $\mu$ l Phusion High-Fidelity buffer, 0.25  $\mu$ l dNTP (25

127 mM), 0.25  $\mu$ l Phusion High-Fidelity DNA Polymerase, and 2.5  $\mu$ l water. The PCR mix was incubated as  
128 follows: 98 °C for 30 s, 10 cycles of 98 °C for 10 s, 65 °C for 30 s and 72 °C for 30 s, and the final elongation  
129 at 72 °C for 5-min. The final library was purified with Ampure DNA beads. Sixty-four libraries with different  
130 indexes were normalized (approximately 10 ng per sample), pooled, and sequenced on one Hiseq 4000  
131 lane of 100-bp paired-end reads at the Beijing Genomics Institute, China. One species (*Isoperla nipponica*)  
132 was discarded because of low raw read output data at three of the four geographical regions. Thus, seven  
133 species were used for downstream analysis.

134

### 135 2.3. De novo assembly and comparative analysis

136 Raw reads were filtered at a quality cut-off of 20 and then trimmed of adapter sequences using the FASTX-  
137 Toolkit (Gordon & Hannon, 2010). Reads trimmed to a size shorter than 50 bp were discarded. *De novo*  
138 transcriptome assembly was conducted on filtered reads for each sample using the Trinity assembler  
139 version 2.2.1 (Haas et al., 2013). Redundant and extremely low-expressed contigs (consensus regions from  
140 overlapping reads) were removed using the filter\_fasta\_by\_resem\_values.pl Trinity-utility. A separate *de*  
141 *novo* transcriptome assembly from the pooled biological replicates of all samples resulted in a lower mean  
142 contig; therefore, sample-specific assemblies were used for subsequent analyses.

143 Homologous genes (i.e., genes inherited from a common ancestor) within a species and orthologous genes  
144 (i.e., genes from different species descended from a common ancestor) among multiple species were  
145 established using two approaches. First, we used MCScan (Wang et al., 2012) to identify putative  
146 homologous regions by synteny relationships (the physical location of contigs on the same putative  
147 chromosome within a species) for all *de novo* assembly contigs from two biological replicates per species.  
148 The relationships were identified based on a pairwise gene comparison of BLAST multiple alignment  
149 (similarity > 60%) scores from the best hit. Genes with the best hits and shared synteny were defined as  
150 homologous, however, genes that were best hits, but not syntenic were also defined as homologous,  
151 because of the existence of possible genomic rearrangements, as suggested by Zhao et al. (2015). The  
152 orthologous search was performed by collecting all homolog-contigs from all species into a single matrix,  
153 which was assembled using the merge mode by StringTie version 2.1.0 (Pertea et al., 2015). This approach  
154 used the BLAST multiple alignment file, thus, we converted the file to a BAM file using Blast2Bam  
155 (<https://github.com/guyduche/Blast2Bam>), and sorted using SAMtools (Li et al., 2009) as an input file for  
156 the assembly. We used the flags `-b` and `-e`. All the homologs and ortholog-contigs (hereafter named as  
157 genes) found were then used to compare gene expression patterns across samples and geographical  
158 regions.

159

### 160 2.4. Gene expression analysis and annotation

161 The read counts for all genes from each sample were quantified using the map-based mode of Salmon  
162 version 0.0.1 (Patro et al., 2017), and selecting the validateMapping option. The files derived from Salmon  
163 were processed with the edgeR version 3.10 package (Robinson et al., 2010) in R version 3.3 (R Core Team,  
164 2014). Gene quantifications were normalized using the Trimmed of Mean of M-values (TMM) method  
165 using the calcNormFactors function, and the counts per million (CPM) reads mapped function based on  
166 both the p-value (< 0.05) and the log2 fold change (> 1). DEG analyses were performed independently for  
167 each of the seven species using the glm function. The Benjamin-Hochberg false discovery rate of 1% was  
168 applied using the p.adjust function. Two species, *A. longispina* and *E. nivalis*, failed to achieve high-



169 expressed genes for the Matsuyama region and were, therefore, excluded from further analysis from this  
170 region only. Heatmaps were generated using the log<sub>2</sub> average expression of genes by combining all  
171 species across four geographical regions with the heatmap R package.

172 A co-expression network analysis among genes between the samples was performed to identify genes  
173 among each species that were associated with latitude. WGCNA (Zhang & Horvath, 2005) was performed  
174 using the WGCNA R package (Langfelder & Hovath, 2008). We followed the tutorials for undirected  
175 WGCNA, which involves a Pearson's correlation for all gene pairs across all samples, the construction of a  
176 similarity matrix of gene expression through a power function, and the hierarchical clustering of samples  
177 based on the correlation with latitude data. Threshold power tests for the WGCNAs were performed using  
178 power = 10; mergeCutHeight = 0.3; min ModuleSize = 30; and TOMType = signed. Latitude data were  
179 obtained based on the geographical distance between each pair of sampling sites using the Euclidean  
180 distance extracted from the geographical coordinates as proposed by Gamboa and Watanabe (2019) using  
181 the Vicenty Ellipsoid package (Karney, 2013) in R. The WGCNA identifies modules based on the hierarchical  
182 clustering of highly interconnected genes that are associated with latitude.

183 The putative function of all gene sets (DEG, WGCNA, and homolog species-specific) was matched against  
184 the National Center for Biotechnology Information non-redundant transcripts and protein database  
185 (BLASTx, evaluate 1 e -3). A homology search was used to explore the whole database without a taxonomical  
186 filter first, and then a taxonomical filter was applied to the search result using arthropods, drosophila, and  
187 stonefly databases. We obtained four separate homology outputs and compared their functions. The  
188 protein-coding genes obtained were subsequently analyzed by Gene Ontology (GO) enrichment analysis.  
189 The homology search and GO were performed using Blast2go version 5.2.5 (Conesa et al., 2005).  
190 Transcript nucleotide sequences were reverse translated by an amino acid converter  
191 ([https://www.bioinformatics.org/sms2/rev\\_trans.html](https://www.bioinformatics.org/sms2/rev_trans.html)), using the universal invertebrate codon code  
192 (<https://www.kazusa.or.jp/codon/>) to evaluate the false discovery rate by BLASTx search  
193 (<https://blast.ncbi.nlm.nih.gov>).

194

## 195 2.5. Proteomics data matching

196 Protein information for the seven species studied here was obtained from Gamboa et al. (2017). Proteins  
197 were used to find a match corresponding to the transcript-genes, to corroborate or improve gene function  
198 identification. The nucleotide sequences of the proteins were obtained through reverse translation with  
199 an amino acid converter ([http://www.bioinformatics.org/sms2/rev\\_trans.htm](http://www.bioinformatics.org/sms2/rev_trans.htm)) using the universal  
200 invertebrate codon code (<http://www.kazusa.or.jp/codon/>). The nucleotide sequences of the proteins  
201 were used to find the matching corresponding transcripts using LAST (Frith & Kawaguchi, 2015) with  
202 multiple alignments (MAFT; Katoh, 2013) and > 60 % similarity. The hierarchical classification of the  
203 putative gene functions obtained was integrated with DAVID Tools (Huang et al., 2009).

204

## 205 2.6. Latitudinal boundaries and drivers

206 The expression diversity per species and geographical region was determined to observe species-specific  
207 differences along the latitudinal gradient using gene expression (TMM-normalized CPM values) on  
208 Simpson's diversity indices in the vegan R package (Oksanen et al., 2012), as proposed by Zhang et al.

209 (2015). Analysis of variance (ANOVA) and Tukey's honest significance difference (HSD) analyses were  
210 performed on pairwise comparisons of the diversity value per species in R. Additionally, the proportion of  
211 gene similarity between each pair of taxa was observed to determine shared genes along the latitudinal  
212 gradient by quantifying the proportional similarity, as proposed by Whittaker (1952).

213 Gene co-expression profile differences in the stonefly communities were further investigated by observing  
214 gene expression patterns between the geographical regions. Principal components analysis (PCA) was  
215 performed from the gene expression (TMM-normalized CPM values) of the co-expressed genes obtained  
216 by the WGCNAs using the vegan R package. A comparison of the functional responses of each geographical  
217 region was further investigated with heatmaps using a log<sub>2</sub> average expression of co-expressed genes in  
218 the heatmap R package.

219

### 220 3. Results

221 Paired-end Illumina sequencing generated 117 million raw reads, with individual counts ranging from 16.7  
222 to 25.3 million per sample (median = 19.9 million reads) in 56 samples (Table S2). A total of 5.7–9.1 million  
223 reads per sample (median = 7.1 million reads) were mapped successfully for *de novo* assembly (Table S2),  
224 which generated 4506 contigs ranging from 534 to 1012 contigs per sample (Table S3). The homologous  
225 and orthologous gene search analyses identified 3078 genes (Table S3), including 101 species-specific  
226 homolog-contigs (Table S4). Following these analyses, the genes were quantified based on the reads  
227 counts retrieving 1736 of the 3078 genes (Table S3).

228

#### 229 3.1. Gene expression differences along the latitudinal gradient

230 A total of 622 of 1736 genes were identified to be differentially expressed ( $p$ -value < 0.05, and log<sub>2</sub> fold  
231 change >1; Table S5) across the four geographical regions. Among the seven species, *H. japonica*, *S.*  
232 *japonicus*, and *T. japonicum* displayed slightly higher numbers of DEGs (an average of 120 genes, and a  
233 range of 100-157 genes).

234 Gene expression changes along the latitudinal gradient were observed using heatmaps. The DEGs  
235 revealed that the largest differences in the gene expression profiles within a species were found in the  
236 different geographical regions (Fig. S1). All stonefly species showed high expression diversity at higher  
237 latitudes (ANOVA < 0.05, Tukey's HSD < 0.05 per species; Fig. 1), suggesting that the dominant factor  
238 influencing expression diversity was the latitude gradient. We observed that at higher latitudes, each  
239 species displayed a larger number of species-specific genes and a lower gene similarity. These  
240 observations decreased with decreasing latitude (Fig. 2). At lower latitudes, the species exhibited high  
241 gene similarity between the species, low expression diversity, and low species-specific gene expression.  
242 This highlights the high similarity of the gene expression profiles between the species.

243 The BALSTx database was used to find the putative function of 723 genes (DEGs = 622, and homolog  
244 species-specific = 101). A blast was found for 174 genes, from which 89 genes were annotated to a  
245 function. We decided to retain five blasted genes without a matching gene ontology annotation for a  
246 possible function in the database. Among the 89 genes, 36% of the annotated genes were successfully  
247 matched to the proteomics data, and their associated proteins were obtained. The functions of several



248 annotated genes that shared the same function were combined and a list of 30 total functions was created  
249 (Table S6). No annotations were found for species-specific or regional-specific genes, possibly because of  
250 the poor database for aquatic insect transcripts. The functions were divided into cellular components,  
251 molecular functions, and biological processes, and among these three, molecular functions were the most  
252 functionally diverse. Across the four geographical regions, the copper-binding functional gene related to  
253 the Hemocyanin protein was the most expressed gene for all species. The generation of precursor  
254 metabolites and energy functions had the highest number of genes with identical functions, suggesting  
255 that more than one related function is highly expressed between the four regions (Table S6).

256

### 257 3.2. Co-expression genes among stonefly species

258 The WGCNA highly correlated 22 genes with latitude, of the 3078 tested genes (Table S7). These 22 genes  
259 were found in 90% of the species in the four geographical regions and were among the expressed genes  
260 obtained through DEGs. PCA was performed to further investigate the gene expression patterns of these  
261 22 genes between the stonefly species. The expression patterns clearly showed four clusters that  
262 represented the four geographical regions on the first two principal component axes (Fig. 3A).  
263 Approximately half of the total variance in the co-expressed gene among the samples was attributable to  
264 differences in latitudes (PCA, 59.6% of total variation). A single principal component axis separated three  
265 of the four geographical regions (Matsuyama, Sendai, and Sapporo). The largest species-gene expression  
266 variation within a geographical region was observed within Sapporo and Gifu.

267 Among the 22 co-expressed genes, 17 genes were annotated to a function and associated with a protein  
268 (Table 1). Genes for respiration, regulation, metabolism, and development were obtained, and their  
269 expressions patterns differed between the four regions. Among these functions, respiration-related genes  
270 and some metabolic genes were upregulated at higher latitudes. In contrast, the development-related  
271 Hexamerin gene was upregulated at lower latitudes (Fig. 3B), which suggests that these genes display a  
272 latitudinal cline.

273

## 274 4. Discussion

275 Gene expression analysis is a powerful tool that can be used to investigate the physiological responses to  
276 environmental conditions or stressors, and can be indicative of environmental tolerance (Evans &  
277 Hofmann, 2012). Here, we explored RNA-seq to investigate the potential contribution of differential gene  
278 expression to latitudinal gradient adaptation across seven stonefly species. We observed that the  
279 latitudinal gradient influenced differential gene expression patterns in stonefly species and also enabled  
280 the co-expression of genes.

281 All seven stonefly species showed significant differential gene expressions along the latitudinal gradient,  
282 which concurs with previous studies on insects (*Drosophila* sp., Zhao et al., 2015; Juneja et al., 2016;  
283 Porcelli et al., 2016), plants (*Oryza sativa*, Nagano et al., 2012), and microbial communities (Salazar et al.,  
284 2019). Both local environmental conditions and the evolutionary history of the organisms could have  
285 played a significant role in this expression divergence. Environmental factors, such as temperature, rainfall,  
286 solar radiation, and humidity along the latitudinal gradient (Willig et al., 2003), are the main drivers of the  
287 selective pressures that result in varying gene expression profiles, which maximize fitness in the local

288 environment (Hoffmann & Sgro, 2011). This was observed previously in the *D. melanogaster* adaptations  
289 that were driven by temperature and rainfall differences across latitudes (Zhao et al., 2015). Similarly, the  
290 evolutionary history of the organism could play a role in gene expression divergence, as observed  
291 previously in the marine snail, *Chlorostoma funebris*. In this species, southern populations may employ  
292 heat-genes in anticipation to heat stress, an adaptation based on the evolutionary history of frequent heat  
293 exposure (Gleason & Burton, 2014). Stoneflies are generally weak fliers, with a limited airborne dispersal  
294 range within stream corridors, a long water stage during its immature stages (Stewart & Stark, 2008), and  
295 an evolutionary history linked with local environmental conditions (Gamboa et al., 2018; Gamboa &  
296 Watanabe, 2019). Thus, both local environmental conditions and evolutionary history could influence the  
297 stonefly gene expression differences we observed.

298 Differences in gene expression profiles among closely related species have been poorly documented;  
299 however, a common observation in gene expression studies indicates that the impacts of local  
300 environmental conditions depend on species-specific physiological traits (Oleksiak et al., 2002; Gleason &  
301 Burton, 2014; Somervuo et al., 2014; Huang et al., 2016; Kenkel & Matz, 2016; Bernal et al., 2020). We  
302 found that stonefly species at higher latitudes tended to increase their expression diversity and species-  
303 specific gene expression, but decrease their gene similarity to other species. This finding implies a stronger  
304 gene expression for species-specific physiological tolerance to higher-latitude regions. The northernmost  
305 region had the lowest atmospheric temperatures (annual mean 0.4 °C) and water temperatures (average  
306 6.5 °C), but the highest water discharge (average 0.7 m<sup>3</sup>/s) (see Table S1). Although stoneflies are  
307 distributed worldwide, a high species diversity tends to occur at high latitudes (DeWalt & Ower, 2019),  
308 indicating that stoneflies can adapt to high-latitude environmental conditions. Likewise, a high water  
309 discharge can be a driving factor that increases stonefly species diversity, because the high disturbance  
310 levels that the habitats undergo allows for a high in-stream drift dispersal (Stewart & Stark, 2008). High  
311 species diversity is often linked with gene expression diversity, because high expression diversity  
312 promotes population persistence to the environment (Pavey et al., 2010). Moreover, high gene expression  
313 diversity at higher-latitude regions is probably associated with low temperatures and high water discharge,  
314 which could be an indicator of the possible adaptive potential of stonefly species.

315 Surprisingly, at lower latitude regions, five stonefly species (*P. incertae*, *H. japonica*, *N. ovocercia*, *T.*  
316 *japonicum*, and *S. japonicus*) displayed low gene expression diversity and high gene similarity, which could  
317 be an indication of environmental stress, as organisms tend to overlap their physiological responses to  
318 cope with stress. For example, the gene expression responses of five coral reef fishes to a heatwave  
319 showed an overlapping physiological response to high temperatures (Bernal et al., 2020). Similarly, the  
320 response of Atlantic salmon (*Salmo salar*) populations to thiamine deficiency (Harder et al., 2020), and  
321 the response of *Quercus lobata* oak populations to drought (Mead et al., 2019) showed physiologically  
322 overlapping responses at different sampling locations. All species studied here have different habitat  
323 preferences and feeding behaviors, therefore, we expected to see different gene expression profiles  
324 between the species, given their species-specific physiological requirements. Hence, the high interspecies  
325 similarity in gene expression profiles at lower latitudes could be interpreted as a strong signal of ongoing  
326 stress synchronization, which could be a coping mechanism to the environmental conditions.

327 In addition to the role of latitudinal-environmental gradients in gene expression differences within each  
328 species, we found 22 latitude-associated co-expressed genes among the seven species. To our knowledge,  
329 co-expressed genes among evolutionarily closed species in the context of a latitude gradient have not yet  
330 been studied, although co-expressed network analysis has been used to accurately correlate genes to

331 environmental conditions, as was the case for five coral fish species to heat (Bernal et al., 2020), and as  
332 well coral (*Porites astreoides*) and their symbionts (*Symbiodinium* sp.) to local adaptation responses  
333 (Kenkel & Matz, 2016). The 22 co-expressed patterns clustered the stonefly communities clearly into four  
334 groups, which represented the four geographical regions. Among these regions, especially large  
335 differences in these 22 gene expression profiles were observed in the Gifu and Sapporo regions. The Gifu  
336 region has been observed previously as a hotspot of species diversity (Gamboa et al., 2018) and genetic  
337 diversity (Gamboa & Watanabe, 2019) for stonefly species, because of the geological formation history of  
338 the Japanese islands, while the Sapporo region has low water temperatures that are a suitable condition  
339 for high protein expression diversity among stonefly species (Gamboa et al., 2017). Moreover, gene  
340 expression may play an important role in the evolutionary process of adaptive divergence in stonefly  
341 species located in the Gifu and Sapporo regions based on their species-specific physiological requirements.

342 Among the 22 co-expressed genes, 17 genes were linked to a function and associated with a protein. The  
343 respiratory-related genes and some metabolic and developmental-related genes showed clear patterns  
344 of latitudinal cline in their expression patterns. The respiratory-related and metabolic genes were  
345 downregulated at decreasing latitudes. Respiratory-related genes are highly abundant in the hemolymph  
346 of stoneflies, especially Hemocyanin (Burmester, 2001). The Hemocyanin gene is highly expressed in  
347 normal oxygen conditions (Amore et al., 2009), but no expression was found in hypoxic (i.e., dissolved  
348 oxygen concentrations < 2 mg O<sub>2</sub>/l) environments (Gamboa, 2020), despite the high survival rate of  
349 stoneflies and their resistance to a lack of oxygen (Malison et al., 2020). This decreased expression of  
350 respiratory-related genes along the latitudinal gradient might indicate that stonefly species employ  
351 compensatory mechanisms to obtain oxygen when dealing with environmental stress (Gamboa, 2020), as  
352 observed previously in other insects (fly *D. melanogaster*, Gleixner et al., 2008; beetle *Tribolium*  
353 *castaneum*, Wang et al., 2018). Metabolic gene expression changes have been reported to be associated  
354 with temperature variations along a latitudinal gradient (Salazar et al., 2019). We identified metabolic  
355 genes related to the biosynthetic process, and cellular responses to a stimulus (acyl carrier activity and  
356 transmembrane receptor protein tyrosine kinase signaling pathway, see Table 1 and Fig. 3). Both genes  
357 have been observed to be associated with temperature fluctuations in other species, such as heat-  
358 moisture changes along a latitudinal gradient in the tree, *Populus trichocarpa* (Zhang et al., 2019). Thus,  
359 these variations in metabolic gene expression along the latitudinal gradient could be a clear signal of  
360 stonefly species adaptation.

361 In contrast, the expression of the developmental-gene, Hexamerins, was upregulated at lower latitudes.  
362 Hexamerins is a non-functional Hemocyanin involved in metamorphosis, molting, reproduction, and  
363 energy production, as it acts as a source of amino-acid storage (Burmester, 1999), and has been associated  
364 with the life-history changes and adaptation of individuals (Kvist et al., 2013), as well as faster  
365 development due to habitat fragmentation (Somervuo et al., 2014). High Hexamerins gene expression at  
366 high temperatures (Zhou et al., 2007) and low water oxygen concentrations (Gamboa, 2020) has been  
367 linked to phenotypic plasticity in insects. Therefore, the high expression of Hexamerins at lower latitudes  
368 could be associated with a developmental adaptation of stonefly species to certain environmental factors,  
369 such as high temperatures or low oxygen concentrations. Overall, our results suggest that co-expressed  
370 genes among the species studied lead to divergent adaptive responses to latitude, despite having the  
371 same gene function. Future studies that target aquatic insect communities, and the genes related to  
372 respiration, metabolism, and development that were found in this study could be used as monitoring  
373 genes that show sensitive responses to the changing environments associated with latitude.

374 Our study showed clear gene expression differences governed by latitudinal adaptation among stonefly  
375 species. Based on our results, we hypothesize that the impact of gene expression diversity on the gene  
376 expression profiles of stonefly species will be reduced more at a lower latitude than at higher-latitude  
377 regions, which could limit the adaptation of these species to warmer temperatures and be an indication  
378 of the potential consequences of climate change on their physiological tolerance. This hypothesis must  
379 be interpreted within the limitations of the data analyzed here, because it cannot account for the  
380 evolutionary adaptation of stonefly species to gradual changes over time. For example, among the seven  
381 species, predator and semi-predator species (*H. japonica*, *S. japonicus*, and *T. japonicum*) displayed a  
382 slightly higher number of DEGs than shredder species (*P. incertae*, *N. ovocercia*, *A. longispina*, and *E.*  
383 *nivalis*), without significant differences (t-test >0.05, data not shown). The differences in gene expression  
384 profiles between these two groups could be accentuated by changing seasons, during which behavior is  
385 affected greatly. Therefore, further studies need to resolve the long-term temporal dynamics of gene  
386 expression profiles among these stonefly species to improve our understanding of the contributions of  
387 gene expression changes within the context of environmental changes. Additionally, individual-based  
388 RNA-seq analysis rather than pooling samples could be used to better understand gene expression  
389 variations at the species level and could provide a different perspective of species adaptation. With the  
390 rapid advances in technology, new RNA extraction methods could also help improve the quality and  
391 quantity of samples for such studies. Similarly, increasing the number of samples and sampling locations  
392 in Japan is needed to further improve the interpretations of gene expression changes in stonefly species  
393 on a spatial scale.

394

## 395 **5. Conclusions**

396 Although latitudinal environmental variations has been studied often to better understand the local  
397 adaptation and environmental gradient impacts on species survival, our knowledge of freshwater  
398 ecosystem species remains scarce. The present study is the first to provide a spatial evaluation of the  
399 mechanisms underpinning community transcriptome changes in aquatic insects. We found that at lower  
400 latitudes, stonefly species tend to reduce gene expression diversity, probably as a method to cope with  
401 environmental stress. By contrast, at higher latitudes, the species displayed species-specific gene  
402 expression patterns that were probably linked with environmental tolerance and long-term evolutionary  
403 adaptation. Community co-expressed genes showed a latitudinal cline, wherein respiratory-related and  
404 metabolic genes could play an essential role in adaptation, and may be used for biomonitoring. Notably,  
405 our study could serve as a framework for future work on integrating temporary data to further investigate  
406 gene-ecosystem models that could improve ecosystem and climate policies.

407

## 408 **6. Supplementary materials**

409 The following supplementary materials are provided: supplementary tables 1-7, and supplementary  
410 figure 1.

411

## 412 **7. Acknowledgments**

413 For logistic support the fieldwork, we kindly thank Sueyoshi Masanao, Terutaka Mori, Ryota Kawanishi,  
414 and Kei Nukazawa.

415

## 416 **8. Funding**

417 This research was supported by the Japan Society of the Promotion of Science (Grant Numbers: 20K04751,  
418 24254003, and 19K21996) and the Endowed Chair Program of the Sumitomo Electric Industries Group  
419 Corporate Social Responsibility Foundation.

420

## 421 **9. Conflict of interest**

422 None declared.

423

## 424 **10. Author contributions**

425 M.G. and K.W. conceived the study; M.G. and K.W. acquired the funding; M.G. collected the field data;  
426 M.G. and Y.G. processed the data; M.G. and A.D.-L. analyzed the data; M.G. wrote the manuscript with  
427 insights from A.D.-L. and K.W.

428

## 429 **11. Data availability statement**

430 RNA-seq raw sequence reads are available from Genbank at the National Center for Biotechnology  
431 Information short-read archive database (BioProject accession no.: PRJNA647250)

432

## 433 **12. References**

434 Amore, V., Belardinelli, M., Guerra, L., Buonocore, F., Fausto, A. M., Ubero-Pascal, N. & Fochetti, R. (2009).  
435 Do all stoneflies nymphs have respiratory proteins? Further data on the presence of hemocyanin in the  
436 larval stages of plecoptera species. *Insect Molecular Biology*, 18, 203–211.

437 Arnone, M. I., & Davidson, E. H. (1997). The hardwiring of development: organization and function of  
438 genomic regulatory systems. *Development*, 124, 1851–1864.

439 Bijlsma, R. & Loeschcke, V. (2005). Environmental Stress, Adaptation and Evolution: An Overview. *Journal*  
440 *of Evolutionary Biology*, 18, 744–749.

441 Bellard, C., Bertelsmeier, C., Leadley, P., Thuiller, W., & Courchamp, F. (2012). Impacts of climate change  
442 on the future of biodiversity. *Ecology Letters*, 15(4), 365–377.

443 Bernal, M. A., Schunter, C., Lehman, R., Lightfoot, D. J., Allan, B. J. M., Veilleux, H. D., ... Ravasi, T. (2020).  
444 Species-specific molecular responses of wild coral reef fishes during a marine heatwave. *Sciences*  
445 *Advances*, 6, eaay3423.

- 446 Burmester, T. (1999). Evolution and function of the insect hexamerins. *European Journal of Entomology*,  
447 96, 213–225.
- 448 Burmester, T. (2001). Molecular evolution of the Arthropod hemocyanin superfamily. *Molecular Biology*  
449 *and Evolution*, 18, 184–195.
- 450 Chou, H., Pathmasiri, W., Deese-spruill, J., Sumner, S. J., Jima, D. D., Funk, D. H., ... Buchwalter, D. B. (2018).  
451 The Good, the Bad, and the Lethal: Gene Expression and Metabolomics Reveal Physiological Mechanisms  
452 Underlying Chronic Thermal Effects in Mayfly Larvae (*Neocloeon triangulifer*). *Frontiers in Ecology and*  
453 *Evolution*, 6, 27.
- 454 Conesa, A., Götz, S., Garcia-Gomez, J. M., Terol, J., Talon, M. & Robles, M. (2005). Blast2GO: a universal  
455 tool for annotation, visualization and analysis in functional genomics research. *Bioinformatics*, 21, 3674–  
456 3676.
- 457 Costa-Silva, J., Domingues, D. & Lopes, F. M. (2017). RNA-Seq Differential Expression Analysis: An  
458 Extended Review and a Software Tool. *PLoS One*, 12, e0190152.
- 459 DeWalt, R. W. & Ower G. D. (2019). Ecosystem services, global diversity, and rate of stonefly species  
460 descriptions (Insecta: Plecoptera). *Insects*, 10, 99.
- 461 Eizaguirre, C., & Baltazar-Soares, M. (2014). Evolutionary conservation—evaluating the adaptive potential  
462 of species. *Evolutionary Applications*, 7(9), 963–967.
- 463 Erzinger, F., Rotter, B., Krezdorn, N., & Pauls, S. U. (2019). Gene expression profiling in the aquatic caddisfly  
464 larvae *Micropterna lateralis* (Insecta: Trichoptera) in relation to stream drying. *Zoosymposia*, 14, 54–58.
- 465 Evans, T. G. & Hofmann, G. E. (2012). Defining the limits of physiological plasticity: how gene expression  
466 can assess and predict the consequences of ocean change. *Philosophical transactions of the Royal Society*  
467 *of London. Series B, Biological sciences*, 367, 1733–1745.
- 468 Fraser, H. B. (2013). Gene expression drives local adaptation in humans. *Genome Research*, 23, 1089–96.
- 469 Frith, M. C. & Kawaguchi, R. (2015). Split-alignment of genomes finds orthologies more accurately.  
470 *Genome Biology*, 16, 106.
- 471 Fuller, T. F., Ghazalpour, A., Aten, J. E., Drake, T. A., Lusi, A. J., & Horvath, S. (2007). Weighted gene  
472 coexpression network analysis strategies applied to mouse weight. *Mammalian Genome*, 18, 463–472.
- 473 Gleason, L. U., & Burton, R. S. (2015). RNA-seq reveals regional differences in transcriptome response to  
474 heat stress in the marine snail *Chlorostoma funebris*. *Molecular Ecology*, 24, 610–627.
- 475 Gleixner, E., Abriss, D., Adryan, B., Kraemer, M., Gerlach, F., Schuh, R., Burmester, T. & Hankeln, T. (2008).  
476 Oxygen-induced changes in hemoglobin expression in *Drosophila*. *The Federation of European*  
477 *Biochemical Societies*, 275, 5108–5116.
- 478 Gamboa, M. (2020). Hemocyanin (Hc) and Hexamerin (Hx) expression in response to hypoxia in stoneflies  
479 (Plecoptera, Insecta). *Archives of Insect Biochemistry and Physiology*, in press.



- 480 Gamboa, M. (2010). Population status of insects of Plecoptera order in Sierra Nevada National Park in  
481 Venezuela and its implications for conservation planning. *International Journal of Tropical Biology and*  
482 *Conservation*, 58, 1299–1310.
- 483 Gamboa, M. & Watanabe, K. (2019). Genome-wide signatures of local adaptation among seven stoneflies  
484 species along a nationwide latitudinal gradient in Japan. *BMC Genomics*, 20, 84.
- 485 Gamboa, M., Tsuchiya, M. C., Matsumoto, S., Iwata, H. & Watanabe, K. (2017). Differences in protein  
486 expression among five species of stream stonefly (Plecoptera) along a latitudinal gradient in Japan.  
487 *Archives of Insect Biochemistry and Physiology*, 96, e21422.
- 488 Gamboa, M., Muranyi, D., Kanmori, S. & Watanabe, K. (2018) Molecular phylogeny and diversification  
489 timing of the Nemouridae family (Insecta, Plecoptera) in the Japanese Archipelago. *PLoS One*, 14,  
490 e0210269.
- 491 Gordon, A. & Hannon, G. J. (2010). FASTX-Toolkit: FASTQ/A short-reads pre-processing tools. Retrieved  
492 from [http://hannonlab.cshl.edu/fastx\\_toolkit/](http://hannonlab.cshl.edu/fastx_toolkit/)
- 493 Haas, B. J., Papanicolaou, A., Yassour, M., Grabherr, M., Blood, P. D., Bowden, J., ... Regev A (2013). De  
494 novo transcript sequence reconstruction from RNA-seq using the Trinity platform for reference generation  
495 and analysis. *Nature Protocols*, 8, 1494–1512.
- 496 Harder, A. M., Willoughby, J. R., Ardren, W. R., & Christie, M. R. (2020). Among-family variation in survival  
497 and gene expression uncovers adaptive genetic variation in a threatened fish. *Molecular Ecology*, 29,  
498 1035–1049.
- 499 Hoffmann, A. A. & Sgrò, C. M. (2011). Climatic change and evolutionary adaptation. *Nature*, 470, 479–  
500 85.
- 501 Holloway, A. K., Lawniczak, M. K. N., Mezey, J. G., Begun, D. J., & Jones, C. D. (2007). Adaptive gene  
502 expression divergence inferred from population genomics. *PLoS Genetics*, 3(10), 2007–2013.
- 503 Hotaling, S., Shah, A. A., McGowan, K. L., Tronstad, L. M., Giersch, J. J., Finn, D. S., ... Kelley, J. L. (2020).  
504 Mountain stoneflies may tolerate warming streams: evidence from organismal physiology and gene  
505 expression. *Global Change Biology*, In press. doi: 10.1111/gcb.15294
- 506 Huang, D. W., Sherman, B. T. & Lempicki, R. A. (2009). Systematic and integrative analysis of large gene  
507 lists using DAVID Bioinformatics Resources. *Nature Protocols*, 4, 44–57.
- 508 Huang, Y., Chain, F. J. J., Panchal, M., Eizaguirre, C., Kalbe, M., Lenz, T., ... Feulner, P. G. D. (2016).  
509 Transcriptome profiling of immune tissues reveals habitat-specific gene expression between lake and river  
510 sticklebacks. *Molecular ecology*, 25, 943–958.
- 511 Juneja, P., Quinn, A., & Jiggins, F. M. (2016). Latitudinal clines in gene expression and cis-regulatory  
512 element variation in *Drosophila melanogaster*. *BMC Genomics*, 17, 981.
- 513 Kanost, M. R., Kawooya, J. K., Law, J. H., Ryan, R. O., Van Heusden, M. C., & Ziegler, R. (1990). Insect  
514 Haemolymph Proteins. In P. D. Evans & V. B. Wigglesworth (Eds.), *Advances in Insect Physiology* (pp. 299–  
515 396). Netherlands: Elsevier.
- 516 Karney, C. F. F. (2013). Algorithms for geodesics. *Journal of Geodesy*, 87, 43–55.

- 517 Katoh, S. (2013). MAFFT multiple sequence alignment software version 7: Improvements in performance  
518 and usability. *Molecular Biology and Evolution*, *30*, 772–780.
- 519 Kawai, T. & Tanida, K. (2005). *Aquatic insects in Japan: manual with keys and illustration*. Japan: Tokai  
520 University press.
- 521 Kenkel, C. D., & Matz, M. V. (2016). Gene expression plasticity as a mechanism of coral adaptation to a  
522 variable environment. *Nature Ecology & Evolution*, *1*, 1–6.
- 523 Keogh, K., Kenny, D. A., & Waters, S. M. (2019). Gene co-expression networks contributing to the  
524 expression of compensatory growth in metabolically active tissues in cattle. *Scientific Reports*, *9*, 6093.
- 525 Klink, R. van, Bowler, D. E., Gongalsky, K. B., Swengel, A. B., Gentile, A., & Chase, J. M. (2020). Meta-analysis  
526 reveals declines in terrestrial but increases in freshwater insect abundances. *Science*, *368*, 417–420.
- 527 Kvist, J., Wheat, C. W., Kallioniemi, E., Saastamoinen, M., Hanski, I. & Frilander, M. J. (2013). Temperature  
528 treatments during larval development reveal extensive heritable and plastic variation in gene expression  
529 and life history traits. *Molecular Ecology*, *22*, 602–619.
- 530 Langfelder, P. & Horvath, S. (2008). WGCNA: an R package for weighted correlation network analysis. *BMC*  
531 *Bioinformatics*, *9*, 559.
- 532 Larsen, P. F., Nielsen, E. E., Williams, T. D., Hemmer-Hansen, J., Chipman, J. K., Kruhøffer, M., ... Loeschcke,  
533 V. (2007). Adaptive differences in gene expression in European flounder (*Platichthys flesus*). *Molecular*  
534 *Ecology*, *16*, 4674–4683.
- 535 Li, H., Handsaker, B., Wysoker, A., Fennell, T., Ruan, J., Homer, N., ... 1000 Genome Project Data Processing  
536 Subgroup (2009). The Sequence alignment/map (SAM) format and SAMtools. *Bioinformatics*, *25*, 2078–  
537 2079.
- 538 Malison, R. L., Ellis, B. K., DelVecchia, A. G. Jacobson, H., Hand, B. K., Luikart, G., ... Stanford, J. A. (in press).  
539 Remarkable anoxia tolerance by stoneflies from a floodplain aquifer. *Ecology*. doi:  
540 <https://doi.org/10.1002/ecy.3127>
- 541 Manel, S., Joost, S., Epperson, B. K., Holderegger, R., Storfer, A., Rosenberg, M. S., ... Fortin, M.-J. (2010).  
542 Perspectives on the use of landscape genetics to detect genetic adaptive variation in the field. *Molecular*  
543 *Ecology*, *19*, 3760–3772.
- 544 Martin, T., & Fraser, H. B. (2018). Comparative expression profiling reveals widespread coordinated  
545 evolution of gene expression across eukaryotes. *Nature Communications*, *9*, 4963.
- 546 Mead, A., Ramirez, J. P., Bartlett, M. K., Wright, J. W., Sack, L., & Sork, V. L. (2019). Seedling response to  
547 water stress in valley oak (*Quercus lobata*) is shaped by different gene networks across populations.  
548 *Molecular Ecology*, *28*, 5248–5264.
- 549 Nagano, A. J., Sato, Y., Mihara, M., Antonio, B. A., Motoyama, R., Itoh, H., Nagamura, Y., & Izawa, T. (2012).  
550 Deciphering and prediction of transcriptome dynamics under fluctuating field conditions. *Cell*, *151*, 1358–  
551 1369.
- 552 Oksanen, J., Blanchet, F. G., Kindt, R., Legendre, P., Minchin, R. B., O’Hara, R. B., ... Wagner H. (2012).  
553 Vegan. Community Ecology R Package. Retrieved from <http://CRAN.R-project/package=vegan>

- 554 Oleksiak, M. F., Churchill, G. A. & Crawford, D. L. (2002). Variation in gene expression within and among  
555 natural populations. *Nature Genetics*, *32*, 261–266.
- 556 Patro, R., Duggal, G., Love, M. I., Irizarry, R. A. & Kingsford, C. (2017). Salmon provides fast and bias-aware  
557 quantification of transcript expression. *Nature Methods*, *14*, 417–419.
- 558 Pavey, S. A., Collin, H., Nosil, P., & Rogers, S. M. (2010). The role of gene expression in ecological speciation.  
559 *Annals of the New York Academy of Sciences*, *1206*(1), 110–129.
- 560 Pertea, M., Pertea, G. M., Antonescu, C. M., Chang, T. C., Mendell, J. T. & Salzberg, S. L. (2015). StringTie  
561 enables improved reconstruction of a transcriptome from RNA-seq reads. *Nature Biotechnology*, *33*, 209–  
562 295.
- 563 Prenda, J. & Gallardo-Mayenco, A. (1999). Distribution patterns, species assemblages and habitat  
564 selection of the stoneflies (Plecoptera) from two Mediterranean river basins in South Spain. *International*  
565 *Review of Hydrobiology*, *84*, 595–608.
- 566 Porcelli, D., Westram, A. M., Pascual, M., Gaston, K. J., Butlin, R. K. & Snook, R. R. (2016). Gene expression  
567 clines reveal local adaptation and associated trade-offs at a continental scale. *Scientific Reports*, *6*, 32975.
- 568 R Core Team (2014). R: A language and environment for statistical computing. R Foundation for Statistical  
569 Computing, Vienna, Austria. Retrieved from <http://www.R-project.org/>
- 570 Rajkumar, A. P., Qvist, P., Lazarus, R., Lescai, F., Ju, J., Nyegaard, M., ... Christensen J. H. (2015).  
571 Experimental validation of methods for differential gene expression analysis and sample pooling in RNA-  
572 seq. *BMC Genomics*, *16*, 548.
- 573 Robinson, M. D., McCarthy, D. J. & Smyth, G. K. (2010). EdgeR: a Bioconductor package for differential  
574 expression analysis of digital gene expression data. *Bioinformatics*, *26*, 139–140.
- 575 Salazar, G., Paoli, L., Alberti, A., Huerta-Cepas, J., Ruscheweyh, H.-J., Cuenca, M., ... Sunagawa, S. (2019).  
576 Gene expression changes and community turnover differentially shape the global ocean  
577 metatranscriptome. *Cell*, *179*, 1068–1083.
- 578 Schadt, E. E., Lamb, J., Yang, X., Zhu, J., Edwards, S., GuhaThakurta, D., ... Lusk, A. J. (2005). An integrative  
579 genomics approach to infer causal associations between gene expression and disease. *Nature Genetics*,  
580 *37*, 710–717.
- 581 Sheldon, A. L. (2012). Possible climate-induced shift of stoneflies in a southern Appalachian catchment.  
582 *Freshwater sciences*, *31*, 765–774.
- 583 Somervuo, P., Kvist, J., Ikonen, S., Auvinen, P., Paulin, L., Koskinen, P., ... Hanski, I. (2014). Transcriptome  
584 Analysis Reveals Signature of Adaptation to Landscape fragmentation. *PLoS One*, *9*, e101467.
- 585 Stewart, K. W., & Stark, B. P. (2008). Plecoptera. In R. W. Merritt, K. W. Cummins, & M. B. Berg (Eds.), *An*  
586 *introduction to the aquatic insects of North America* (pp. 311–384). Duquque, IA: Kendall/Hunt Publishing  
587 Co.
- 588 Stuart, J. M., Segal, E., Koller, D., & Kim, S. K. (2003). A Gene-Coexpression Network for Global Discovery  
589 of Conserved Genetic Modules. *Science*, *302*, 249–255.

- 590 Teets, N. M., Peyton, J. T., Colinet, H., Renault, D., Kelley, J. L., Kawarasaki, Y., Lee, R. E. & Denlinger, D. L.  
591 (2012). Gene expression changes governing extreme dehydration tolerance in an Antarctic insect.  
592 *Proceedings of the National Academy of Sciences*, *109*, 20744–20749.
- 593 Uebbing, S., Künstner, A., Mäkinen, H., Backström, N., Bolivar, P., Burri, R., ... Ellegren, H. (2016).  
594 Divergence in Gene Expression within and between Two Closely Related Flycatcher Species. *Molecular*  
595 *Ecology*, *25*, 2015–2028.
- 596 Wang, L., Si, Y., Dedow, L. K., Shao, Y., Liu, P. & Brutnell, T. P. (2011). A low-cost library construction  
597 protocol and data analysis pipeline for illumine-based strand specific multiplex RNA-seq. *PLoS One*, *6*,  
598 e26426.
- 599 Wang, L., Cui, S., Liu, Z., Ping, Y., Qiu, J. & Geng, X. (2018). Inhibition of mitochondrial respiration under  
600 hypoxia and increased antioxidant activity after reoxygenation of *Tribolium castaneum*. *PLoS One*, *13*,  
601 e0199056.
- 602 Wang, Y., Tang, H., DeBarry, J. D., Tan, X., Li, J., Wang, X., ... Paterson, A. H. (2012). MCSanX: a toolkit for  
603 detection and evolutionary analysis of gene synteny and collinearity. *Nucleic Acid Research*, *40*, e49.
- 604 Whittaker, R. H. (1952). A study of summary foliage insect communities in the Great Smoky Mountains.  
605 *Ecological Monographs*, *22*, 1–44.
- 606 Whitehead, A. & Crawford, D. L. (2006). Variation within and among Species in Gene Expression: Raw  
607 Material for Evolution. *Molecular Ecology*, *15*, 1197–1211.
- 608 Willig, M. R., Kaufman, D. M., & Stevens, R. D. (2003). Latitudinal Gradients of Biodiversity: Pattern,  
609 Process, Scale, and Synthesis. *Annual Review of Ecology, Evolution, and Systematics*, *34*, 273–309.
- 610 Wisecaver, J. H., Borowsky, A. T., Tzin, V., Jander, G., Kliebenstein, D. J., & Rokas, A. (2017). A Global  
611 Coexpression Network Approach for Connecting Genes to Specialized Metabolic Pathways in Plants. *The*  
612 *Plant Cell*, *29*, 944–959.
- 613 Zhao, L., Wit, J., Svetec, N. & Begun, D. J. (2015). Parallel gene expression differences between low and  
614 high latitude populations of *Drosophila melanogaster* and *D. simulans*. *PLoS Genetics*, *11*, e1005184.
- 615 Zhang, B. & Horvath, S. (2005). A General Framework for Weighted Gene Co-Expression Network Analysis.  
616 *Statistical Applications in Genetics and Molecular Biology*, *4*, 1544–6115.
- 617 Zhang, F., Cui L., & Kuo, M. D. (2015). Diversity of gene expression in hepatocellular carcinoma cells.  
618 *Genomics, Proteomics and Bioinformatics*, *13*, 377–382.
- 619 Zhang, M., Suren, H., & Holliday, J. A. (2019). Phenotypic and Genomic Local Adaptation across Latitude  
620 and Altitude in *Populus trichocarpa*. *Genome Biology and Evolution*, *11*, 2256–2272.
- 621 Zhou, X., Tarver, M. R., & Scharf, M. E. (2007). Hexamerin-based regulation of juvenile hormone-  
622 dependent gene expression underlies phenotypic plasticity in a social insect. *Development*, *134*, 601–610.

Table 1. Functional annotated and blasted genes obtained from weighted gene co-expression network analysis (WGCNA) and their associated proteins. GO = Gene ontology, GR = geographical region, M = Matsuyama, G = Gifu, S = Sendai, Sa = Sapporo.

| GO term                   | Functional annotation                         | p-value  | Associated protein      | Protein similarity | David classification | GR | <i>H. japonica</i> | <i>N. ovocercia</i> | <i>S. japonicus</i> | <i>T. japonicum</i> | <i>A. longispina</i> | <i>P. incertae</i> | <i>E. nivalis</i> |
|---------------------------|-----------------------------------------------|----------|-------------------------|--------------------|----------------------|----|--------------------|---------------------|---------------------|---------------------|----------------------|--------------------|-------------------|
| <b>Cellular component</b> |                                               |          |                         |                    |                      |    |                    |                     |                     |                     |                      |                    |                   |
| GO:0016021                | integral component of membrane                | 3.88E-06 | Accessory gland protein | 98%                | Reproduction         | M  |                    | 2                   | 2                   | 2                   |                      | 2                  |                   |
|                           |                                               |          |                         |                    |                      | G  |                    | 1                   |                     | 2                   | 1                    | 1                  | 1                 |
|                           |                                               |          |                         |                    |                      | S  | 2                  | 1                   |                     | 1                   |                      |                    |                   |
|                           |                                               |          |                         |                    |                      | Sa | 1                  | 1                   | 2                   |                     |                      | 2                  | 1                 |
| GO:0070469                | respirasome                                   | 6.90E-05 |                         |                    |                      | M  |                    | 1                   |                     |                     |                      | 1                  |                   |
|                           |                                               |          |                         |                    |                      | G  |                    |                     |                     | 1                   |                      |                    |                   |
|                           |                                               |          |                         |                    |                      | S  |                    | 1                   |                     | 1                   |                      |                    |                   |
|                           |                                               |          |                         |                    |                      | Sa |                    |                     | 1                   | 1                   | 1                    | 1                  |                   |
| GO:0005739                | mitochondrion. Tissue respiration             | 8.22E-07 |                         |                    |                      | M  | 1                  | 2                   | 2                   | 2                   |                      |                    |                   |
|                           |                                               |          |                         |                    |                      | G  |                    | 1                   |                     | 1                   | 1                    | 2                  | 1                 |
|                           |                                               |          |                         |                    |                      | S  | 2                  | 2                   |                     | 1                   |                      |                    |                   |
|                           |                                               |          |                         |                    |                      | Sa | 1                  | 1                   | 1                   | 1                   |                      | 1                  | 1                 |
| <b>Molecular function</b> |                                               |          |                         |                    |                      |    |                    |                     |                     |                     |                      |                    |                   |
| GO:0000036                | acyl carrier activity                         | 6.39E-05 |                         |                    |                      | M  |                    | 1                   | 1                   |                     |                      | 1                  |                   |
|                           |                                               |          |                         |                    |                      | G  | 1                  |                     |                     |                     |                      |                    | 1                 |
|                           |                                               |          |                         |                    |                      | S  |                    |                     | 1                   | 1                   |                      |                    |                   |
|                           |                                               |          |                         |                    |                      | Sa | 1                  |                     | 1                   | 1                   |                      | 1                  |                   |
| GO:0005524                | ATP binding                                   | 1.03E-06 | Protein GDAP2           | 73%                | Regulation           | M  |                    | 1                   | 1                   | 1                   |                      | 1                  |                   |
|                           |                                               |          |                         |                    |                      | G  |                    | 1                   | 2                   | 1                   |                      |                    | 1                 |
|                           |                                               |          |                         |                    |                      | S  | 3                  |                     | 2                   | 1                   |                      |                    |                   |
|                           |                                               |          |                         |                    |                      | Sa | 2                  | 1                   | 1                   | 2                   | 1                    |                    | 1                 |
| GO:0004435                | phosphatidylinositol phospholipase C activity | 5.20E-07 |                         |                    |                      | M  | 1                  | 1                   | 1                   | 1                   |                      |                    |                   |
|                           |                                               |          |                         |                    |                      | G  | 1                  | 1                   | 1                   | 1                   | 1                    | 1                  | 1                 |
|                           |                                               |          |                         |                    |                      | S  |                    |                     |                     | 1                   |                      |                    |                   |

|                           |                                                                     |          |                                        |     |             |    |   |   |   |   |   |   |   |   |
|---------------------------|---------------------------------------------------------------------|----------|----------------------------------------|-----|-------------|----|---|---|---|---|---|---|---|---|
| GO:0005507                | copper ion binding                                                  | 2.38E-05 | Hemocyanin sub 2                       | 89% | Respiratory | Sa |   |   |   | 1 |   |   |   | 1 |
|                           |                                                                     |          |                                        |     |             | M  | 2 | 1 | 5 | 1 |   | 2 |   |   |
|                           |                                                                     |          |                                        |     |             | G  |   | 1 | 3 | 1 | 1 | 1 | 1 |   |
|                           |                                                                     |          |                                        |     |             | S  | 2 |   | 4 | 2 |   |   |   |   |
| GO:0016491                | oxidoreductase activity                                             | 2.65E-05 |                                        |     |             | Sa | 3 |   | 2 | 4 |   | 2 | 2 |   |
|                           |                                                                     |          |                                        |     |             | M  |   | 1 | 1 | 1 |   |   |   |   |
|                           |                                                                     |          |                                        |     |             | G  | 1 | 1 | 1 |   |   |   | 1 |   |
|                           |                                                                     |          |                                        |     |             | S  |   | 1 |   |   |   |   |   |   |
| GO:0005504                | fatty acid binding                                                  | 6.06E-08 | Peptide methionine sulfoxide reductase | 63% | Development | Sa |   | 1 |   |   |   |   |   |   |
|                           |                                                                     |          |                                        |     |             | M  |   | 1 |   |   |   |   |   |   |
|                           |                                                                     |          |                                        |     |             | G  |   |   | 1 | 1 | 1 |   |   |   |
|                           |                                                                     |          |                                        |     |             | S  | 1 |   |   | 1 |   |   |   |   |
| GO:0003723                | RNA binding                                                         | 6.54E-06 | Protein penguin                        | 81% | Development | Sa |   | 1 |   | 1 |   | 1 | 1 |   |
|                           |                                                                     |          |                                        |     |             | M  |   | 1 | 1 | 1 |   | 1 |   |   |
|                           |                                                                     |          |                                        |     |             | G  | 1 | 1 | 1 | 1 | 1 | 1 | 1 |   |
|                           |                                                                     |          |                                        |     |             | S  | 1 | 1 |   | 1 |   |   |   |   |
| <hr/>                     |                                                                     |          |                                        |     |             |    |   |   |   |   |   |   |   |   |
| <b>Biological process</b> |                                                                     |          |                                        |     |             |    |   |   |   |   |   |   |   |   |
| GO:0006091                | generation of precursor metabolites and energy                      | 3.94E-05 |                                        |     |             | M  |   | 2 | 4 |   |   | 2 | 1 |   |
|                           |                                                                     |          |                                        |     |             | G  | 2 |   | 1 | 2 | 1 | 1 |   |   |
|                           |                                                                     |          |                                        |     |             | S  | 3 | 1 | 2 | 2 |   |   |   |   |
|                           |                                                                     |          |                                        |     |             | Sa | 2 | 2 | 3 | 3 | 2 | 2 | 3 |   |
| GO:0000184                | nuclear-transcribed mRNA catabolic process, nonsense-mediated decay | 6.85E-06 | Peptide methionine sulfoxide reductase | 69% | Metabolic   | M  | 1 | 1 | 1 | 1 |   | 1 |   |   |
|                           |                                                                     |          |                                        |     |             | G  | 1 | 1 | 1 | 1 | 1 | 1 | 1 |   |
|                           |                                                                     |          |                                        |     |             | S  | 1 | 1 | 1 | 1 | 1 | 1 | 1 |   |
|                           |                                                                     |          |                                        |     |             | Sa | 1 | 1 | 1 | 1 | 1 | 1 | 1 |   |



|                |                                                                  |          |                                                        |     |                                |    |   |   |   |   |   |   |   |
|----------------|------------------------------------------------------------------|----------|--------------------------------------------------------|-----|--------------------------------|----|---|---|---|---|---|---|---|
| GO:0007169     | transmembrane receptor protein tyrosine kinase signaling pathway | 4.70E-06 | Transient-receptor-potential-like protein              | 62% | Metabolic                      | M  | 1 |   | 1 |   |   |   |   |
|                |                                                                  |          |                                                        |     |                                | G  | 1 |   | 1 |   |   |   |   |
|                |                                                                  |          |                                                        |     |                                | S  |   | 1 |   |   |   |   |   |
|                |                                                                  |          |                                                        |     |                                | Sa |   |   |   | 1 | 1 | 1 |   |
| GO:0042773     | ATP synthesis coupled electron transport                         | 1.40E-05 | ATP synthase                                           | 73% | Regulation                     | M  | 1 |   |   |   |   |   |   |
|                |                                                                  |          |                                                        |     |                                | G  |   | 1 |   |   |   | 1 |   |
|                |                                                                  |          |                                                        |     |                                | S  | 1 |   |   | 1 |   |   |   |
|                |                                                                  |          |                                                        |     |                                | Sa | 1 | 1 | 1 |   |   | 1 | 1 |
| GO:0042742     | response to stimulus                                             | 4.42E-08 |                                                        |     |                                | M  | 1 |   | 1 | 1 |   | 1 |   |
|                |                                                                  |          |                                                        |     |                                | G  |   |   |   | 1 |   |   | 1 |
|                |                                                                  |          |                                                        |     |                                | S  | 2 |   | 1 | 1 |   |   |   |
|                |                                                                  |          |                                                        |     |                                | Sa |   | 1 | 2 | 2 |   |   | 1 |
| GO:0000956     | nuclear-transcribed mRNA catabolic process                       | 5.14E-14 | Eukaryotic translation initiation factor 3 subunit F-1 | 72% | Gene regulation of development | M  | 1 | 1 | 1 | 1 |   | 1 |   |
|                |                                                                  |          |                                                        |     |                                | G  |   | 1 | 1 | 1 | 1 | 1 | 1 |
|                |                                                                  |          |                                                        |     |                                | S  | 1 |   |   |   |   | 1 | 1 |
|                |                                                                  |          |                                                        |     |                                | Sa | 1 | 1 | 1 | 1 | 1 | 1 | 1 |
| <b>Blasted</b> |                                                                  |          |                                                        |     |                                |    |   |   |   |   |   |   |   |
|                | Hexamerin                                                        | 1.10E-06 | Hexamerin                                              | 98% | Development                    | M  | 1 | 1 | 1 | 1 |   | 1 |   |
|                |                                                                  |          |                                                        |     |                                | G  | 1 | 1 | 1 | 1 | 1 | 1 | 1 |
|                |                                                                  |          |                                                        |     |                                | S  | 1 | 1 | 1 | 1 | 1 | 1 | 1 |
|                |                                                                  |          |                                                        |     |                                | Sa | 1 | 1 | 1 | 1 | 1 | 1 | 1 |

## List of Figures

Fig. 1. The expression diversity of stonefly species along the latitude gradient. H = *Haploperla japónica*, N = *Nemoura ovocercia*, S = *Stavsolus japonicus*, T = *Taenionema japonicum*, A = *Amphinemura longispina*, P = *Perlodini incertae*, E = *Eocapnia nivalis*.

Fig. 2. Differentially expressed genes (DEGs) of seven stonefly species across four geographical regions in Japan. Red colors represent highly expressed genes, while blue colors represent low expression (a color key is located on the lower right side). The proportion of gene similarity among species is shown at the top of the heatmap by each geographical region. The Venn diagram showing the number of DEGs found per and among geographical regions is located on the upper left side.

Fig. 3. Comparison of geographical region co-expressed genes among seven species. (A) Principal component analyses of 22 co-expressed genes among four geographical regions. Red points represent Matsuyama, blue points Gifu, green points Sendai and purple points Sapporo. (B) Heatmap representing 17 of the 22 co-expressed genes that were functionally annotated by gene ontology (GO) analysis and blast. Oxi.R = oxidoreductase activity (GO:0016491), Mito.TR = mitochondrion, RP = respirasome (GO:0070469), Hm = copper ion binding (GO:0005507) Hemocyanin protein, ATP = ATP synthase (GO:0042773), ATP.B = ATP binding (GO:0005524), ICM = integral component of membrane (GO:0016021), ACCA = acyl carrier activity (GO:0000036), TM.PK = transmembrane receptor protein tyrosine kinase signaling pathway (GO:0007169), Metab = generation of precursor metabolites and energy (GO:0006091), RS = response to stimulus (GO:0042742), Phos.C = phosphatidylinositol phospholipase C activity (GO:0004435), NT.CP = nuclear-transcribed mRNA catabolic process (GO:0000956), NT.mRNA = nuclear-transcribed mRNA catabolic process, RNA.B = RNA binding (GO:0003723), Fatty.AC = fatty acid binding (GO:0005504), Hx = Hexamerin.

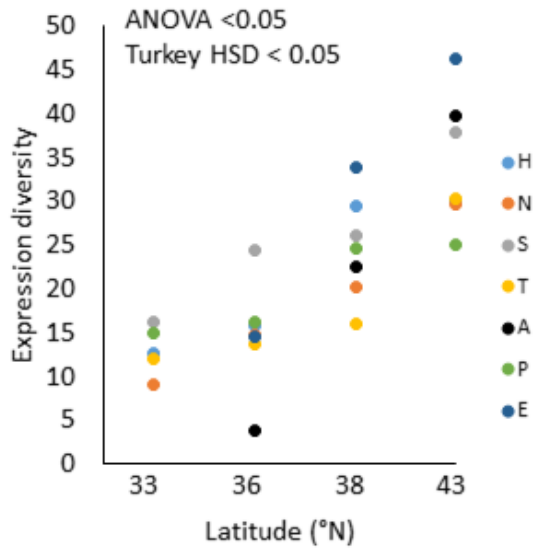

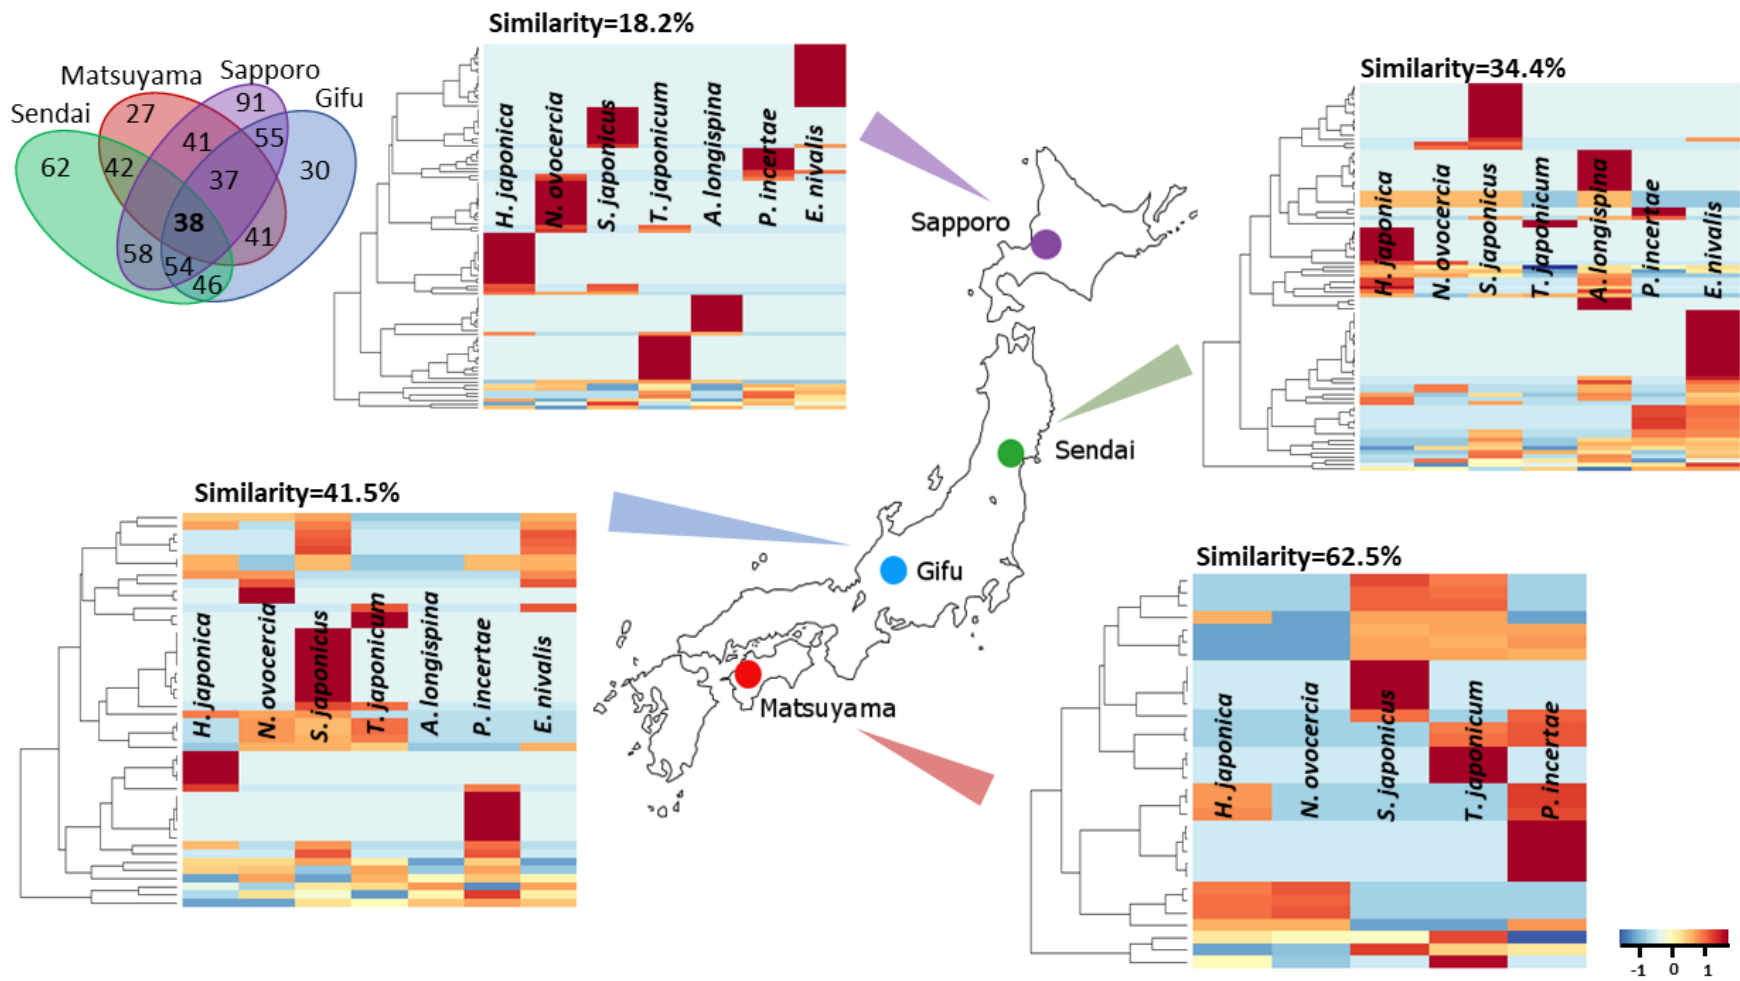

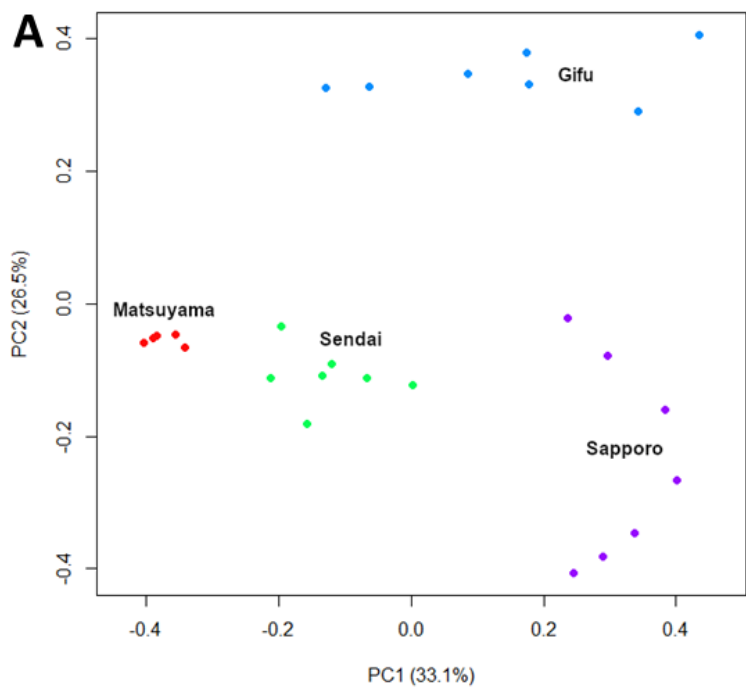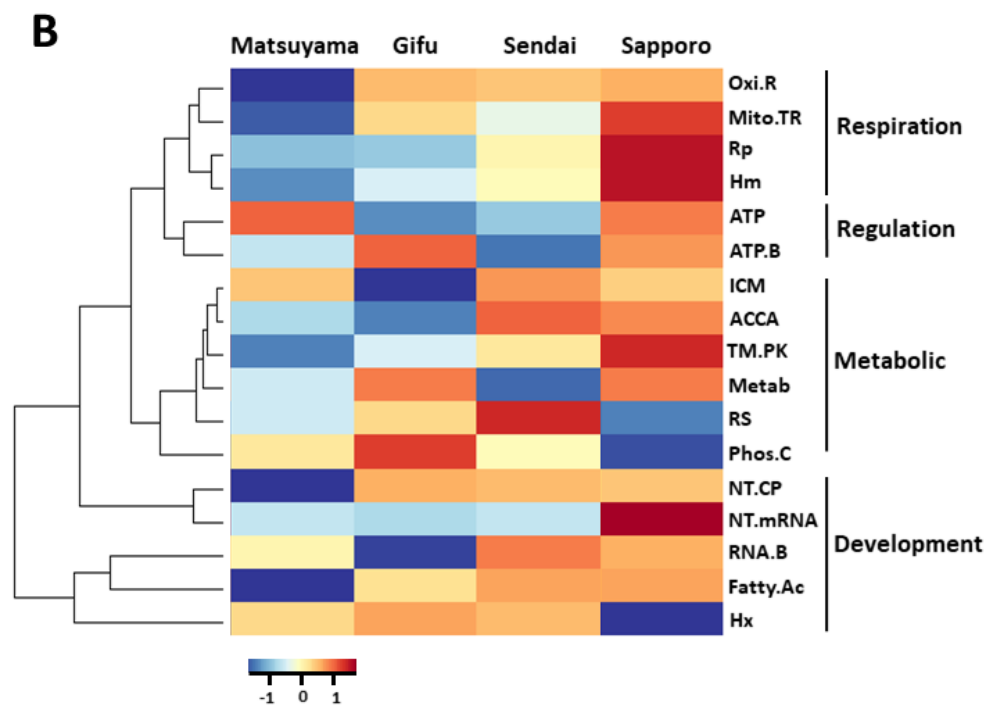

1 **Supporting information**

2 Table S1. Sampling site information for the four geographical regions in Japan, including the average values for their environmental conditions.

| Sampling region  | Stream name | Altitude (m) | Longitude  | Latitude | Environmental conditions |                 |                                     |                 |                      |
|------------------|-------------|--------------|------------|----------|--------------------------|-----------------|-------------------------------------|-----------------|----------------------|
|                  |             |              |            |          | Precipitation (mm)       | Water level (m) | Water Discharge (m <sup>3</sup> /s) | Water temp (°C) | Air temperature (°C) |
| <b>Matsuyama</b> |             |              |            |          |                          |                 |                                     |                 |                      |
| M1               | Ishite      | 277          | 132.864167 | 33.9     | 0.112                    | 1.28            | 0.39                                | 12.3            | 10.3                 |
| M2               | Ishite      | 270          | 132.864167 | 33.8976  | 0.112                    | 1.281           | 0.38                                | 12.2            | 10.3                 |
| M3               | Ishite      | 269          | 132.864167 | 33.8977  | 0.112                    | 1.282           | 0.39                                | 12.4            | 10.3                 |
| <b>Gifu</b>      |             |              |            |          |                          |                 |                                     |                 |                      |
| G1               | Nagara      | 720          | 136.948889 | 35.6568  | 0.2658                   | 1.502           | 0.42                                | 9.4             | 2.6                  |
| G2               | Hida        | 720          | 137.288056 | 36.0189  | 0.2658                   | 1.503           | 0.42                                | 9.4             | 2.6                  |
| G3               | Kosaka      | 718          | 137.288056 | 35.9245  | 0.2658                   | 1.5             | 0.41                                | 9.2             | 2.6                  |
| <b>Sendai</b>    |             |              |            |          |                          |                 |                                     |                 |                      |



|    |        |     |            |         |        |       |     |     |     |
|----|--------|-----|------------|---------|--------|-------|-----|-----|-----|
| S1 | Hirose | 261 | 140.626944 | 38.3208 | 0.2376 | 1.19  | 0.3 | 8   | 8.1 |
| S2 | Natori | 315 | 140.593056 | 38.2706 | 0.2376 | 1.196 | 0.3 | 8.2 | 8.1 |
| S3 | Natori | 250 | 140.864167 | 38.7978 | 0.2376 | 1.196 | 0.3 | 8.2 | 8.1 |

---

**Sapporo**

|     |           |     |            |         |        |       |      |     |     |
|-----|-----------|-----|------------|---------|--------|-------|------|-----|-----|
| Sa1 | Ashibetsu | 305 | 142.135556 | 43.3168 | 0.1158 | 3.996 | 0.72 | 6.5 | 0.4 |
| Sa2 | Toyohira  | 247 | 141.254167 | 42.9565 | 0.1158 | 3.996 | 0.73 | 6.7 | 0.4 |
| Sa3 | Makomanai | 298 | 141.321944 | 42.9084 | 0.1158 | 3.995 | 0.72 | 6.6 | 0.4 |

---

Table S2. The number of total raw reads obtained following Illumina Hi-seq 4000 100bp paired-end sequencing and the number of reads mapped to *de novo* transcriptome assembly.

| Samples              | Location    | Raw reads  | Mapped reads |
|----------------------|-------------|------------|--------------|
| <i>H. japonica</i>   | Matsuyama.1 | 16,764,058 | 6,035,061    |
|                      | Matsuyama.2 | 23,386,390 | 8,419,100    |
|                      | Gifu.1      | 21,161,006 | 7,617,962    |
|                      | Gifu.2      | 20,687,764 | 7,447,595    |
|                      | Sendai.1    | 18,352,016 | 6,606,725    |
|                      | Sendai.2    | 19,987,938 | 7,195,657    |
|                      | Sapporo.1   | 19,642,970 | 7,071,469    |
|                      | Sapporo.2   | 19,374,262 | 6,974,734    |
| <i>N. ovocercia</i>  | Matsuyama.1 | 23,655,204 | 8,515,873    |
|                      | Matsuyama.2 | 18,980,066 | 6,832,823    |
|                      | Gifu.1      | 19,409,926 | 6,987,573    |
|                      | Gifu.2      | 19,158,016 | 6,896,885    |
|                      | Sendai.1    | 18,200,802 | 6,552,288    |
|                      | Sendai.2    | 19,042,230 | 6,855,203    |
|                      | Sapporo.1   | 17,888,558 | 6,439,881    |
|                      | Sapporo.2   | 18,352,106 | 6,606,758    |
| <i>S. japonicus</i>  | Matsuyama.1 | 18,244,020 | 6,567,847    |
|                      | Matsuyama.2 | 20,829,064 | 7,498,463    |
|                      | Gifu.1      | 24,091,696 | 8,673,011    |
|                      | Gifu.2      | 17,266,168 | 6,215,820    |
|                      | Sendai.1    | 17,363,874 | 6,250,994    |
|                      | Sendai.2    | 17,504,798 | 6,301,727    |
|                      | Sapporo.1   | 20,878,276 | 7,516,179    |
|                      | Sapporo.2   | 20,941,176 | 7,538,823    |
| <i>T. japonicum</i>  | Matsuyama.1 | 18,299,488 | 6,587,815    |
|                      | Matsuyama.2 | 20,111,116 | 7,240,001    |
|                      | Gifu.1      | 18,176,400 | 6,543,504    |
|                      | Gifu.2      | 19,344,372 | 6,963,973    |
|                      | Sendai.1    | 19,896,202 | 7,162,632    |
|                      | Sendai.2    | 19,199,666 | 6,911,879    |
|                      | Sapporo.1   | 18,730,870 | 6,743,113    |
|                      | Sapporo.2   | 18,731,276 | 6,743,259    |
| <i>A. longispina</i> | Matsuyama.1 | 16,357,902 | 5,888,844    |
|                      | Matsuyama.2 | 16,099,812 | 5,795,932    |
|                      | Gifu.1      | 18,282,240 | 6,581,606    |
|                      | Gifu.2      | 19,852,040 | 7,146,734    |

|                    |             |            |           |
|--------------------|-------------|------------|-----------|
|                    | Sendai.1    | 19,183,750 | 6,906,150 |
|                    | Sendai.2    | 20,502,234 | 7,380,804 |
|                    | Sapporo.1   | 19,291,826 | 6,945,057 |
|                    | Sapporo.2   | 18,109,931 | 6,519,575 |
| <i>P. incertae</i> | Matsuyama.1 | 19,428,652 | 6,994,314 |
|                    | Matsuyama.2 | 20,059,878 | 7,221,556 |
|                    | Gifu.1      | 18,716,366 | 6,737,892 |
|                    | Gifu.2      | 20,469,518 | 7,369,026 |
|                    | Sendai.1    | 21,837,606 | 7,861,538 |
|                    | Sendai.2    | 22,087,498 | 7,951,499 |
|                    | Sapporo.1   | 21,996,856 | 7,918,868 |
|                    | Sapporo.2   | 22,987,546 | 8,275,516 |
| <i>E. nivalis</i>  | Matsuyama.1 | 21,144,935 | 7,612,176 |
|                    | Matsuyama.2 | 20,332,101 | 7,319,556 |
|                    | Gifu.1      | 21,077,804 | 7,588,009 |
|                    | Gifu.2      | 22,796,724 | 8,206,820 |
|                    | Sendai.1    | 21,941,086 | 7,898,790 |
|                    | Sendai.2    | 25,000,668 | 9,000,240 |
|                    | Sapporo.1   | 20,897,608 | 7,523,139 |
|                    | Sapporo.2   | 25,300,918 | 9,108,330 |

Table S3. The number of genes obtained by performing *de novo* assembly, following homologs-orthologs search, and gene quantification analysis.

|                      | <u><i>de novo</i> assembly</u> | Homologs-<br>Orthologs | Gene quantification |
|----------------------|--------------------------------|------------------------|---------------------|
| <i>H. japonica</i>   | 560                            | 358                    | 209                 |
| <i>N. ovocercia</i>  | 618                            | 459                    | 292                 |
| <i>S. japonicus</i>  | 1012                           | 820                    | 451                 |
| <i>T. japonicum</i>  | 659                            | 510                    | 238                 |
| <i>A. longispina</i> | 567                            | 309                    | 122                 |
| <i>P. incertae</i>   | 558                            | 407                    | 227                 |
| <i>E. nivalis</i>    | 532                            | 215                    | 197                 |
| <b>Total</b>         | <b>4506</b>                    | <b>3078</b>            | <b>1736</b>         |

Table S4. The number of species-specific genes obtained following homologous identification based on reciprocal BLAST analysis.

|                      | Matsuyama | Gifu     | Sendai    | Sapporo   |
|----------------------|-----------|----------|-----------|-----------|
| <i>H. japonica</i>   |           | 1        | 4         | 11        |
| <i>N. ovocercia</i>  |           |          |           | 7         |
| <i>S. japonicus</i>  |           | 4        | 11        | 6         |
| <i>T. japonicum</i>  | 1         |          |           | 8         |
| <i>A. longispina</i> |           |          | 6         | 9         |
| <i>P. incertae</i>   | 1         |          | 3         | 4         |
| <i>E. nivalis</i>    |           |          | 12        | 13        |
| <b>Total</b>         | <b>2</b>  | <b>5</b> | <b>36</b> | <b>58</b> |

Table S5. The number of differentially expressed genes among stoneflies species (false discovery rate < 0.01).

|                      | Matsuyama | Gifu       | Sendai     | Sapporo    | Total DE genes |
|----------------------|-----------|------------|------------|------------|----------------|
| <i>H. japonica</i>   | 9         | 46         | 14         | 31         | 100            |
| <i>N. ovocercia</i>  | 14        | 11         | 32         | 18         | 75             |
| <i>S. japonicus</i>  | 31        | 31         | 31         | 64         | 157            |
| <i>T. japonicum</i>  | 19        | 26         | 23         | 35         | 103            |
| <i>A. longispina</i> |           | 10         | 12         | 18         | 40             |
| <i>P. incertae</i>   | 23        | 11         | 26         | 24         | 84             |
| <i>E. nivalis</i>    |           | 12         | 13         | 38         | 63             |
| <b>Total</b>         | <b>96</b> | <b>147</b> | <b>151</b> | <b>228</b> | <b>622</b>     |

Table S6. Functional annotated and blasted genes obtained from differential expression (DEs), weight gene co-expression network analysis (WGCN), and homologs species-specific analysis summarized on 30 functions and their associated protein. GO = Gene ontology, GR = geographical region, M = Matsuyama, G = Gifu, S = Sendai, Sa = Sapporo.

| GO term                   | Functional annotation                                  | p-value  | Associated Protein                          | Protein similarity | David classification | GR | <i>H. japonica</i> | <i>N. ovocercia</i> | <i>S. japonicus</i> | <i>T. japonicum</i> | <i>A. longispina</i> | <i>P. incertae</i> | <i>E. nivalis</i> |
|---------------------------|--------------------------------------------------------|----------|---------------------------------------------|--------------------|----------------------|----|--------------------|---------------------|---------------------|---------------------|----------------------|--------------------|-------------------|
| <b>Cellular component</b> |                                                        |          |                                             |                    |                      |    |                    |                     |                     |                     |                      |                    |                   |
| GO:0000276                | mitochondrial proton-transporting ATP synthase complex | 9.10E-06 | Succinate dehydrogenase assembly factor 2-A | 68%                | Respiratory          | M  | 1                  |                     | 1                   |                     |                      |                    |                   |
|                           |                                                        |          |                                             |                    |                      | S  | 1                  |                     | 1                   |                     |                      |                    |                   |
|                           |                                                        |          |                                             |                    |                      | Sa |                    |                     | 1                   |                     |                      |                    |                   |
| GO:0016021                | integral component of membrane                         | 3.88E-06 | Accessory gland protein                     | 98%                | Reproduction         | M  |                    | 2                   | 2                   | 2                   |                      | 2                  |                   |
|                           |                                                        |          |                                             |                    |                      | G  |                    | 1                   |                     | 2                   | 1                    | 1                  | 1                 |
|                           |                                                        |          |                                             |                    |                      | S  | 2                  | 1                   |                     | 1                   |                      |                    |                   |
|                           |                                                        |          |                                             |                    |                      | Sa | 1                  | 1                   | 2                   |                     |                      | 2                  | 1                 |
| GO:0070469                | respirasome                                            | 6.90E-05 |                                             |                    |                      | M  |                    | 1                   |                     |                     |                      | 1                  |                   |
|                           |                                                        |          |                                             |                    |                      | G  |                    |                     |                     | 1                   |                      |                    |                   |
|                           |                                                        |          |                                             |                    |                      | S  |                    | 1                   |                     | 1                   |                      |                    |                   |
|                           |                                                        |          |                                             |                    |                      | Sa |                    |                     | 1                   | 1                   | 1                    | 1                  |                   |
| GO:0005739                | mitochondrion. Tissue respiration                      | 8.22E-07 |                                             |                    |                      | M  | 1                  | 2                   | 2                   | 2                   |                      |                    |                   |
|                           |                                                        |          |                                             |                    |                      | G  |                    | 1                   |                     | 1                   | 1                    | 2                  | 1                 |
|                           |                                                        |          |                                             |                    |                      | S  | 2                  | 2                   |                     | 1                   |                      |                    |                   |
|                           |                                                        |          |                                             |                    |                      | Sa | 1                  | 1                   | 1                   | 1                   |                      | 1                  | 1                 |
| <b>Molecular function</b> |                                                        |          |                                             |                    |                      |    |                    |                     |                     |                     |                      |                    |                   |
| GO:0000036                | acyl carrier activity                                  | 6.39E-05 |                                             |                    |                      | M  |                    | 1                   | 1                   |                     |                      | 1                  |                   |
|                           |                                                        |          |                                             |                    |                      | G  | 1                  |                     |                     |                     |                      |                    | 1                 |

|            |                                               |          |                                        |     |             |    |   |   |   |   |   |   |   |
|------------|-----------------------------------------------|----------|----------------------------------------|-----|-------------|----|---|---|---|---|---|---|---|
| GO:0005524 | ATP binding                                   | 1.03E-06 | Protein GDAP2                          | 73% | Regulation  | S  |   |   | 1 | 1 |   |   |   |
|            |                                               |          |                                        |     |             | Sa | 1 |   | 1 | 1 |   | 1 |   |
|            |                                               |          |                                        |     |             | M  |   | 1 | 1 | 1 |   | 1 |   |
|            |                                               |          |                                        |     |             | G  |   | 1 | 2 | 1 |   |   | 1 |
|            |                                               |          |                                        |     |             | S  | 3 |   | 2 | 1 |   |   |   |
| GO:0004435 | phosphatidylinositol phospholipase C activity | 5.20E-07 |                                        |     |             | Sa | 2 | 1 | 1 | 2 | 1 |   | 1 |
|            |                                               |          |                                        |     |             | M  | 1 | 1 | 1 | 1 |   |   |   |
|            |                                               |          |                                        |     |             | G  | 1 | 1 | 1 | 1 | 1 | 1 | 1 |
|            |                                               |          |                                        |     |             | S  |   |   |   | 1 |   |   |   |
|            |                                               |          |                                        |     |             | Sa |   |   |   | 1 |   |   | 1 |
| GO:0005507 | copper ion binding                            | 2.38E-05 | Hemocyanin sub 2                       | 89% | Respiratory | M  | 2 | 1 | 5 | 1 |   | 2 |   |
|            |                                               |          |                                        |     |             | G  |   | 1 | 3 | 1 | 1 | 1 | 1 |
|            |                                               |          |                                        |     |             | S  | 2 |   | 4 | 2 |   |   |   |
|            |                                               |          |                                        |     |             | Sa | 3 |   | 2 | 4 |   | 2 | 2 |
|            |                                               |          |                                        |     |             | M  |   | 1 | 1 | 1 |   |   |   |
| GO:0016491 | oxidoreductase activity                       | 2.65E-05 |                                        |     |             | G  | 1 | 1 | 1 |   |   |   | 1 |
|            |                                               |          |                                        |     |             | S  |   | 1 |   |   |   |   |   |
|            |                                               |          |                                        |     |             | Sa |   | 1 |   |   |   |   |   |
|            |                                               |          |                                        |     |             | M  |   |   |   |   |   |   |   |
|            |                                               |          |                                        |     |             | G  |   |   |   |   |   |   |   |
| GO:0005504 | fatty acid binding                            | 6.06E-08 | Peptide methionine sulfoxide reductase | 63% | Development | M  |   | 1 |   |   |   |   |   |
|            |                                               |          |                                        |     |             | G  |   |   | 1 | 1 | 1 |   |   |
|            |                                               |          |                                        |     |             | S  | 1 |   |   | 1 |   |   |   |
|            |                                               |          |                                        |     |             | Sa |   | 1 |   | 1 |   | 1 | 1 |
|            |                                               |          |                                        |     |             | M  |   |   |   |   |   |   |   |
| GO:0003723 | RNA binding                                   | 6.54E-06 | Protein penguin                        | 81% | Development | M  |   | 1 | 1 | 1 |   | 1 |   |
|            |                                               |          |                                        |     |             | G  | 1 | 1 | 1 | 1 | 1 | 1 | 1 |
|            |                                               |          |                                        |     |             | S  | 1 | 1 |   | 1 |   |   |   |
|            |                                               |          |                                        |     |             | Sa |   |   | 1 |   |   | 1 |   |
|            |                                               |          |                                        |     |             | M  |   |   |   |   |   |   |   |



|            |                                                                           |          |                                                 |     |           |    |   |   |   |   |   |   |   |
|------------|---------------------------------------------------------------------------|----------|-------------------------------------------------|-----|-----------|----|---|---|---|---|---|---|---|
| GO:0005509 | calcium ion binding                                                       | 4.49E-05 |                                                 |     | G         |    |   | 1 |   |   |   |   |   |
| GO:0008137 | NADH dehydrogenase<br>(ubiquinone) activity                               | 9.43E-05 |                                                 |     | M         |    |   | 1 |   |   |   | 1 |   |
|            |                                                                           |          |                                                 |     | S         | 1  |   |   |   | 1 |   |   |   |
|            |                                                                           |          |                                                 |     | Sa        |    | 1 | 1 |   |   |   | 1 | 1 |
| GO:0004672 | protein kinase activity                                                   | 3.23E-08 |                                                 |     | M         |    |   |   |   |   |   | 1 |   |
|            |                                                                           |          |                                                 |     | G         |    |   |   |   |   |   | 1 |   |
|            |                                                                           |          |                                                 |     | S         | 1  |   | 1 |   |   |   |   |   |
|            |                                                                           |          |                                                 |     | Sa        |    |   | 1 | 1 |   |   | 1 |   |
| GO:0004486 | methylenetetrahydrofolate<br>dehydrogenase<br>[NAD(P)+] activity          | 9.00E-06 |                                                 |     | G         |    |   | 1 |   |   |   |   |   |
|            |                                                                           |          |                                                 |     | S         | 1  |   |   |   |   |   |   |   |
|            |                                                                           |          |                                                 |     | Sa        |    |   |   |   |   |   | 1 | 1 |
| <hr/>      |                                                                           |          |                                                 |     |           |    |   |   |   |   |   |   |   |
|            | <b>Biological process</b>                                                 |          |                                                 |     |           |    |   |   |   |   |   |   |   |
| GO:0006886 | intracellular protein<br>transport                                        | 1.30E-06 |                                                 |     | M         |    |   | 1 | 1 |   |   |   |   |
|            |                                                                           |          |                                                 |     | G         |    |   |   |   |   |   | 1 |   |
|            |                                                                           |          |                                                 |     | S         |    | 1 | 1 | 1 |   |   |   |   |
|            |                                                                           |          |                                                 |     | Sa        |    | 1 |   |   |   | 1 |   | 1 |
| GO:0006091 | generation of precursor<br>metabolites and energy                         | 3.94E-05 |                                                 |     | M         |    | 2 | 4 |   |   |   | 2 | 1 |
|            |                                                                           |          |                                                 |     | G         | 2  |   | 1 | 2 | 1 | 1 |   |   |
|            |                                                                           |          |                                                 |     | S         | 3  | 1 | 2 | 2 |   |   |   |   |
|            |                                                                           |          |                                                 |     | Sa        | 2  | 2 | 3 | 3 | 2 | 2 | 3 |   |
| GO:0000184 | nuclear-transcribed<br>mRNA catabolic process,<br>nonsense-mediated decay | 6.85E-06 | Peptide<br>methionine<br>sulfoxide<br>reductase | 69% | Metabolic | M  | 1 | 1 | 1 | 1 |   | 1 |   |
|            |                                                                           |          |                                                 |     |           | G  | 1 | 1 | 1 | 1 | 1 | 1 | 1 |
|            |                                                                           |          |                                                 |     |           | S  | 1 | 1 | 1 | 1 | 1 | 1 | 1 |
|            |                                                                           |          |                                                 |     |           | Sa | 1 | 1 | 1 | 1 | 1 | 1 | 1 |
| GO:0000165 | MAPK cascade                                                              | 5.28E-05 |                                                 |     | M         |    |   | 1 |   |   |   |   |   |

|            |                                                                  |          |                                                        |     |                                |    |   |   |   |   |   |  |   |   |   |   |   |   |
|------------|------------------------------------------------------------------|----------|--------------------------------------------------------|-----|--------------------------------|----|---|---|---|---|---|--|---|---|---|---|---|---|
|            |                                                                  |          |                                                        |     |                                | S  | 1 |   | 1 |   |   |  |   |   |   |   |   |   |
|            |                                                                  |          |                                                        |     |                                | Sa | 1 |   |   |   | 1 |  |   |   |   |   |   |   |
| GO:0007169 | transmembrane receptor protein tyrosine kinase signaling pathway | 4.70E-06 | Transient-receptor-potential-like protein              | 62% | Metabolic                      | M  |   | 1 |   |   | 1 |  |   |   |   |   |   |   |
|            |                                                                  |          |                                                        |     |                                | G  |   | 1 |   |   | 1 |  |   |   |   |   |   |   |
|            |                                                                  |          |                                                        |     |                                | S  |   |   |   | 1 |   |  |   |   |   |   |   |   |
|            |                                                                  |          |                                                        |     |                                | Sa |   |   |   |   |   |  | 1 | 1 | 1 |   |   |   |
| GO:0000413 | protein peptidyl-prolyl isomerization. Metabolic nitrogen        | 2.65E-04 |                                                        |     |                                | M  | 1 | 1 | 1 | 1 |   |  |   |   | 1 |   |   |   |
|            |                                                                  |          |                                                        |     |                                | G  |   |   | 1 |   |   |  |   |   | 1 |   |   |   |
|            |                                                                  |          |                                                        |     |                                | S  | 1 |   |   |   |   |  |   |   |   |   |   |   |
|            |                                                                  |          |                                                        |     |                                | Sa |   |   |   |   | 1 |  |   |   | 1 | 1 | 1 |   |
| GO:0042773 | ATP synthesis coupled electron transport                         | 1.40E-05 | ATP synthase                                           | 73% | Regulation                     | M  |   | 1 |   |   |   |  |   |   |   |   |   |   |
|            |                                                                  |          |                                                        |     |                                | G  |   |   |   | 1 |   |  |   |   |   | 1 |   |   |
|            |                                                                  |          |                                                        |     |                                | S  | 1 |   |   |   | 1 |  |   |   |   |   |   |   |
|            |                                                                  |          |                                                        |     |                                | Sa | 1 | 1 | 1 |   |   |  |   |   | 1 | 1 |   |   |
| GO:0006082 | organic acid metabolic process                                   | 9.53E-06 |                                                        |     |                                | M  |   |   |   | 1 |   |  |   |   |   |   |   |   |
|            |                                                                  |          |                                                        |     |                                | G  |   |   |   | 1 |   |  |   |   |   |   |   |   |
|            |                                                                  |          |                                                        |     |                                | Sa | 1 |   |   | 1 |   |  |   |   |   |   |   | 1 |
| GO:0042742 | response to stimulus                                             | 4.42E-08 |                                                        |     |                                | M  | 1 |   | 1 | 1 |   |  |   |   | 1 |   |   |   |
|            |                                                                  |          |                                                        |     |                                | G  |   |   |   |   | 1 |  |   |   |   |   |   | 1 |
|            |                                                                  |          |                                                        |     |                                | S  | 2 |   |   | 1 | 1 |  |   |   |   |   |   |   |
|            |                                                                  |          |                                                        |     |                                | Sa |   |   | 1 | 2 | 2 |  |   |   |   |   |   | 1 |
|            |                                                                  |          |                                                        |     |                                |    |   |   |   |   |   |  |   |   |   |   |   |   |
| GO:0000956 | nuclear-transcribed mRNA catabolic process                       | 5.14E-14 | Eukaryotic translation initiation factor 3 subunit F-1 | 72% | Gene regulation of development | M  | 1 | 1 | 1 | 1 |   |  |   |   | 1 |   |   |   |
|            |                                                                  |          |                                                        |     |                                | G  |   |   | 1 | 1 | 1 |  |   | 1 | 1 |   |   |   |

|                                                                   |          |           |     |             |    |   |   |   |   |   |   |   |
|-------------------------------------------------------------------|----------|-----------|-----|-------------|----|---|---|---|---|---|---|---|
|                                                                   |          |           |     |             | S  | 1 |   |   |   |   | 1 | 1 |
|                                                                   |          |           |     |             | Sa | 1 | 1 | 1 | 1 | 1 | 1 | 1 |
| <b>Blasted</b>                                                    |          |           |     |             |    |   |   |   |   |   |   |   |
| Hexamerin                                                         | 1.10E-06 | Hexamerin | 98% | Development | M  | 1 | 1 | 1 | 1 |   | 1 |   |
|                                                                   |          |           |     |             | G  | 1 | 1 | 1 | 1 | 1 | 1 | 1 |
|                                                                   |          |           |     |             | S  | 1 | 1 | 1 | 1 | 1 | 1 | 1 |
|                                                                   |          |           |     |             | Sa | 1 | 1 | 1 | 1 | 1 | 1 | 1 |
| 28S ribosomal RNA gene sequence                                   | 6.90E-05 |           |     |             | M  |   |   |   |   |   | 1 |   |
|                                                                   |          |           |     |             | G  |   |   | 1 |   |   | 1 |   |
|                                                                   |          |           |     |             | S  | 1 |   | 1 |   |   |   |   |
|                                                                   |          |           |     |             | Sa |   |   | 1 |   |   |   |   |
| 18S ribosomal RNA gene sequence                                   | 9.36E-05 |           |     |             | M  |   | 1 | 1 |   |   | 1 |   |
|                                                                   |          |           |     |             | G  |   |   | 1 |   |   |   |   |
|                                                                   |          |           |     |             | S  |   |   |   | 1 |   |   |   |
|                                                                   |          |           |     |             | Sa |   |   | 1 | 1 |   | 1 | 1 |
| elongation factor                                                 | 2.47E-05 |           |     |             | M  |   | 1 | 1 | 1 |   | 1 |   |
|                                                                   |          |           |     |             | G  |   | 1 | 1 |   |   | 1 | 1 |
|                                                                   |          |           |     |             | S  | 1 | 1 |   | 1 |   |   |   |
|                                                                   |          |           |     |             | Sa | 1 |   | 1 |   | 1 |   |   |
| serine-rich adhesin for platelets. Exoskeletons actin-rich domain | 6.13E-05 |           |     |             | M  |   | 1 |   | 1 |   |   |   |
|                                                                   |          |           |     |             | G  |   |   |   | 1 |   | 1 |   |
|                                                                   |          |           |     |             | S  |   |   | 1 |   |   |   |   |
|                                                                   |          |           |     |             | Sa |   |   | 1 |   |   | 1 | 1 |

Table S7. Weight gene co-expression network analysis (WGCNA) modules with a high association to latitude across samples.

| WGCNA modules | Correlation | p-value | Associated genes |
|---------------|-------------|---------|------------------|
| MEbrown       | 0.140103    | 0.041   | 2                |
| MEred         | 0.358910    | 0.007   | 4                |
| MEblack       | 0.310956    | 0.012   | 5                |
| MEblue        | 0.257571    | 0.020   | 2                |
| MEturquoise   | 0.272889    | 0.007   | 3                |
| MEgreen       | 0.272109    | 0.017   | 2                |
| MEyellow      | 0.215771    | 0.009   | 3                |
| MEgrey        | 0.145937    | 0.042   | 1                |

Fig S1. Differentially expressed genes (DEGs) of the stonefly species across 4 geographical regions in Japan. Red colors represent high expressed genes, while blue colors represent low (a color key is located at the downside). M = Matsuyama; G = Gifu; S = Sendai; Sa = Sapporo.

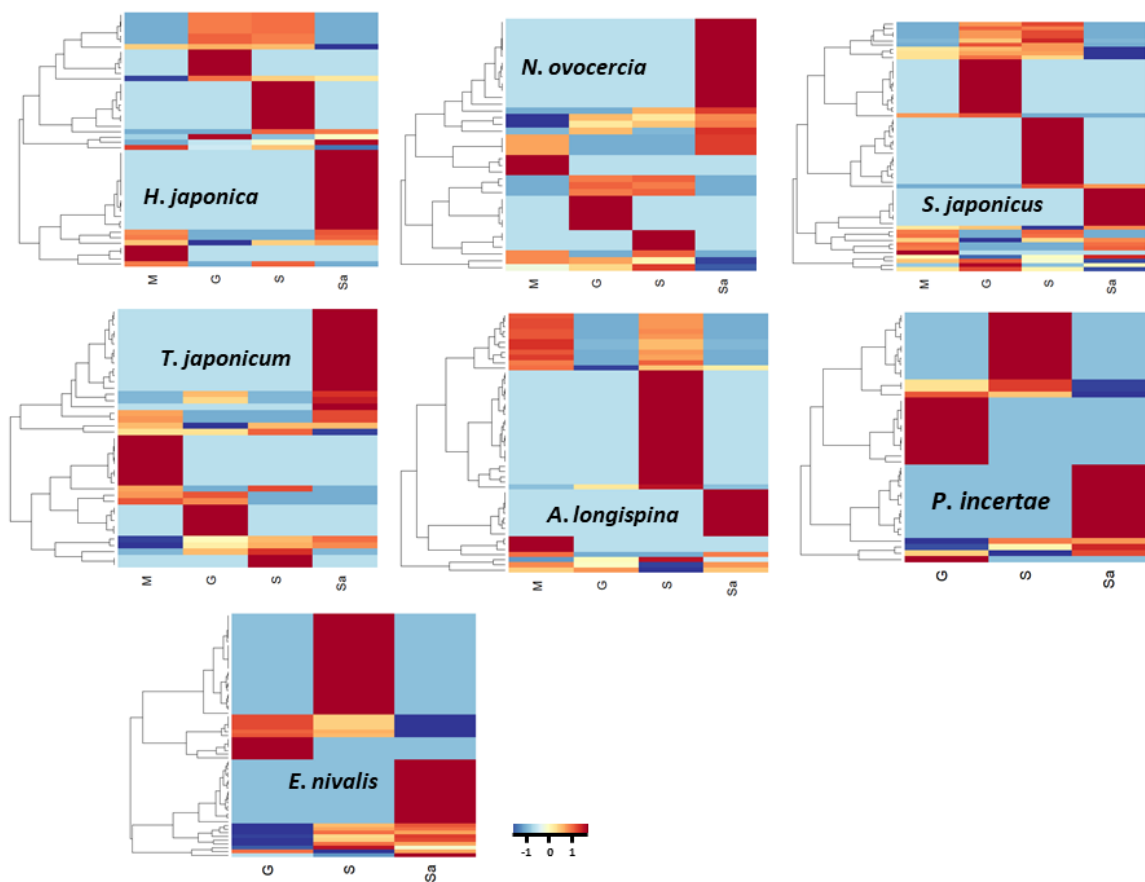

Source: http://biorxiv.org/content/10.1101/2020.09.22.309179v1.full.pdf
